## Mini-III RNase-based dual-color system for *in vivo* mRNA tracking

**Authors:** Lin Zhang, Luxi Chen, Jing Chen, Weimin Shen and Anming Meng\*

**Affiliation:** Laboratory of Molecular Developmental Biology, State Key Laboratory of Membrane Biology, Beijing 100084, China; Tsinghua-Peking Center for Life Sciences, Beijing 100084, China; School of Life Sciences, Tsinghua University, Beijing 100084, China.

**Key words:** RNA imaging, mini-III RNase, dsRNA, zebrafish, embryo,

\*To whom correspondence may be addressed. Tel: 86-10-62772256; Email: mengam@mail.tsinghua.edu.cn

### Summary Statement

Fluorescent antisense probe and inactive form of *Staphylococcus epidermidis* Mini-III RNase with a fluorescent tag may be used together to visualize endogenous mRNAs in zebrafish embryos.

## ABSTRACT

Mini-III RNase (mR3), a member of RNase III endonuclease family, can bind to and cleave double-stranded RNAs (dsRNAs). Inactive mR3 protein without the  $\alpha 5\beta$ - $\alpha 6$  loop loses the dsRNA cleavage activity, but retains dsRNA binding activity. Here, we establish an inactive mR3-based, non-engineered mR3/dsRNA system for RNA tracking in zebrafish embryos. *In vitro* binding experiments show that, inactive *Staphylococcus epidermidis* mR3 (dSmR3) protein possesses the highest binding affinity with dsRNAs among mR3s from other related species, and its binding property is retained in zebrafish embryos. Combined with a fluorescein-labeled antisense RNA probe recognizing the target mRNAs, dSmR3 tagged with an NLS and a fluorescent protein could allow visualizing the dynamics of endogenous target mRNAs. The dSmR3/antisense probe dual-color system provides a new approach to track non-engineered RNAs in real-time, which would help understand how endogenous RNAs dynamically move during embryonic development.

## INTRODUCTION

Asymmetric localization of mRNAs within a cell can lead to their own unequal transmission to daughter cells or asymmetric distribution of their protein products, thus regulating cell behaviors (Johnstone and Lasko, 2001; King et al., 2005; Paquin and Chartrand, 2008; Yan et al., 2018). To visualize mRNA dynamics in real-time in living cultured cells or live organisms, an antisense RNA with a fluorophore or embedded RNA structure is usually combined with a recognizing reporter fluorescent protein or fluorophores for application (Paige et al., 2011). For example, multiple copies of MS2 19-nucleotide stem loop sequence (MS2 aptamers) derived from a single-stranded RNA bacteriophage can be inserted into the target gene, and the resulting mRNA in living cells or organisms could be visualized by the MCP coat protein fused to a fluorescent protein through binding to the MS2 aptamers (Bertrand et al., 1998; Campbell et al., 2015; Lionnet et al., 2011; Lucas et al., 2013; Park et al., 2014; Yoon et al., 2016); the system consisting of the bacteriophage PBS sequence/the PP7 coat protein has also been utilized for monitoring *in vivo* transcription initiation and elongation on eukaryotic loci (Larson et al., 2011). A Spinach-like RNA aptamer fused to an mRNA could be visualized by insertion of a GFP-like fluorophore (Paige et al., 2011). The RNA-binding Pumilio homology domain (PUM-HD) of human PUMILIO1 has been utilized to visualize mitochondrial RNA in single living cells (Cheong and Hall, 2006; Ozawa et al., 2007; Wang et al., 2002). Endogenous RNAs without engineered tags may be visualized using complementary hybridization probes with fluorophores (so called “molecular beacons”) (Bratu et al., 2003; Tyagi and Kramer, 1996; Vargas et al., 2005). Recently, catalytically inactive members of CRISPR/Cas family, such as Cas9 and Cas13a, have also been used to track RNAs in cell lines (Abudayyeh et al., 2017; Abudayyeh et al., 2016; Nelles et al., 2016; Yang et al., 2019). The wide application of these RNA imaging technologies has been limited due to fussy, laborious design and engineering of RNA aptamers, molecular beacons or proteins.

Easier alternatives for tracking mRNAs are needed.

Ribonuclease III (RNase III) is a class of ribonucleases that bind to and cleave dsRNAs (Court et al., 2013). Unlike other RNase IIIs that contain a dsRNA-binding domain and separate catalytic domain(s), Mini-III RNase (mR3), which was first identified in *Bacillus subtilis* and participated in the maturation of 23s ribosomal RNA, contains a catalytic domain but lacks recognizable dsRNA-binding domain (Redko et al., 2008). It has been shown that mR3s from different bacterial species could cleave long dsRNA with a certain degree of sequence specificity (Glow et al., 2016; Glow et al., 2015). Interestingly, deletion of the  $\alpha 5\beta$ - $\alpha 6$  loop of *Bacillus subtilis* mR3 results in loss of catalytic activity and preservation of sequence-independent dsRNA-binding activity (Glow et al., 2015).

Given that inactive mR3 is able to bind dsRNAs (Glow et al., 2015), we hypothesize that its fusion with a fluorescent reporter protein may be used to monitor dynamics of target mRNAs that form dsRNAs with exogenous complementary antisense oligonucleotides. In this study, we show that an inactive mR3 from *Staphylococcus epidermidis* (dSmR3) possesses higher binding affinity to dsRNA than those from other related species. Using nuclear localized dSmR3 protein and fluorescein-labeled antisense RNA probe, we established a new system for in vivo tracking of endogenous mRNAs, called mR3/dsRNA system. This new system provides an alternative to track movement of mRNAs in living embryos.

## RESULTS

### dSmR3 possesses high dsRNA-binding affinity in vitro

We chose 12 mR3 genes annotated in 12 bacterial species of the firmicutes (Glow et al., 2015) and synthesized them individually with addition of the Flag tag but with removal of the  $\alpha 5\beta$ - $\alpha 6$  loop required for catalytic activity (Table S1). The synthetic genes were cloned and expressed in *E. coli* (Fig. S1A). All of the expressed proteins were purified (Fig. S1A) and

used to test their substrate binding affinity by ELISA (Fig. 1A). As binding of mR3 to dsRNA depends on the structure of dsRNA rather than RNA sequence (Glow et al., 2016; Masliah et al., 2013; Tian et al., 2004), we synthesized two 100-bp dsRNAs with incorporation of biotin-UTP, *actb2-dsR-P1* and *actb2-dsR-P2*, which correspond to the P1 region within the coding sequence and the P2 region in the 3' untranslated region (UTR) of the zebrafish *actb2* gene (Fig. S1B), respectively. Two binding buffers with different iron concentrations were used and named as low salt buffer (LSB, 10 mM Tris-HCl pH 7.5, 5 mM NaCl, 1 mM MgCl<sub>2</sub>, 0.1 mg/mL BSA) (Glow et al., 2015) and high salt buffer (HSB, 20 mM HEPES-KOH pH 7.5, 140 mM KCl, 12 mM NaCl, 2 mM MgCl<sub>2</sub>, 5% glycerol). The ionic composition of HSB is much similar to the intracellular ion environment (Lang, 2007). ELISA screening results showed that, among the 12 tested mR3s, inactive mR3 derived from *Staphylococcus epidermidis*, dSmR3, possesses the highest binding affinity with *actb2-dsR-P1* and *actb2-dsR-P2* in either buffer (Fig. 1B-E), followed by inactive mR3 protein from *Staphylococcus aureus* (*Sau*). Therefore, we chose dSmR3 for subsequent experiments.

Next, we constructed other different forms of dSmR3 protein and compared their binding affinity. To make dSepmR3 protein visible for RNA tracking, a flexible linker (linker 1) and a mCherry tag was fused to its C-terminal (Fig. 1F). To decrease the background signal in the cytosol, its N-terminal was fused with an NLS and the new version was then called dSmR3n. Since mR3 functions as homodimer (Redko et al., 2008), we constructed tandem dimer forms of dSmR3n, which contained two monomers linked directly or with different lengths of linker (linker 2) (Fig. 1F). Different forms of dSmR3n were expressed in *E. coli* and purified for binding affinity test (Fig. S1C). ELISA results showed that dSepmR3 tandem dimer proteins tended to have higher affinity with *actb2-dsR-P1* than the monomer protein, and that insertion of the mCherry tag had no inhibitory effect on the dsRNA-binding ability (Fig. 1G, H). The variant dSmR3n-tdV1-mCherry (thereafter referred to as dSmR3nd-mCherry) had the highest

binding affinity for *actb2-dsR-P1*. Even if a 50-bp dsRNA (*actb2-dsR-P4*) (Fig. S1B) was used, dSmR3nd-mCherry still showed the highest binding affinity (Fig. 1I, J). Then, dSmR3nd-mCherry was used for the following analyses.

### **dSmR3 can bind to dsRNAs in zebrafish embryos**

We further tested the binding ability of dSmR3nd to dsRNA substrate in zebrafish embryos by RNA immunoprecipitation. An mRNA named '*RSGM*' was *in vitro* transcribed. It consisted of *Renilla luciferase* coding sequence (*Luc*), 100-nt sense *gfp* and six copies of MS2 RNA aptamers (Fig. 2A, left). The *RM* mRNA was made by removing the sense *gfp* sequence from *RSGM* (Fig. 2A, right) and used as a control mRNA. Meanwhile, we synthesized three tandem copies of 100-nt antisense (as) *gfp* RNA, *as-gfp* (probe), which is complementary to the sense *gfp* in *RSGM*. The dSmR3nd-GFP fusion protein, which resembles dSmR3nd-mCherry except for fluorescent protein, was expressed in *E. coli* and purified. Then, one-cell stage embryos were first injected with *RSGM* or *RM* mRNA plus *as-gfp*, followed by injection with dSmR3nd-GFP protein. The embryos were harvested at 2.5 hpf and lysed for pulling down dsRNAs formed between *RSGM* and the *as-gfp* probe using GFP antibody. The immunoprecipitated dsRNA was used to detect *Luc* or *as-gfp* by qRT-PCR (Fig. 2B). Compared to co-injection of *RM* and *as-gfp*, co-injection of *RSGM* and *as-gfp* resulted in significant enrichment of both *Luc* and *as-gfp* in the dsRNA precipitate (Fig. 2C). This result suggests that, within live embryonic cells, an antisense RNA can form dsRNA with its target mRNA, which can be recognized and bound by dSmR3nd-GFP fusion protein.

We asked whether the injected antisense RNA probes are stable in living embryos. To address this issue, *as-gfp* and *actb2-as-P3* (3x100-nt sequence complementary to *actb2-P3* shown in Fig. S1B) RNA probes, each at 100 pg/embryo, were co-injected into one-cell stage embryos, and relative levels of probes were analyzed by qRT-PCR using intramolecularly

ligated RNA template at various time points during first 24 hours of development. As shown in Fig. 2D, 42-52% of input RNA were retained at 2.5 hpf and 6 hpf, and 21-25% were retained at 24 hpf. This result implies that exogenous antisense RNA probes in embryos are degraded only in part during early development and the undegraded probes could bind endogenous target mRNAs for several hours.

Previous studies suggest that exogenous long dsRNAs (> 600 bp) induce degradation of target mRNAs as well as unrelated mRNAs and thus cause abnormal development in zebrafish embryos (Oates et al., 2000; Zhao et al., 2001). We wondered whether *RSGM/as-gfp* dsRNA and dsRNA/dSmR3nd-GFP complex within embryonic cells affect the target mRNA stability and embryonic development. To address this question, we quantified *RSGM* mRNA levels by qRT-PCR analysis at 2.5 hpf following injections with *RSGM* mRNA, *as-gfp* probe and dSmR3nd-GFP protein in different combinations. Results showed that co-injection of dSmR3nd-GFP protein with *RSGM* mRNA had no obvious effect on *RSGM* mRNA level (Fig. 2E). In contrast, co-injection of *as-gfp* and *RSGM* mRNA resulted in a significant decrease of *RSGM* mRNA level, which could be alleviated by co-injection with dSmR3nd-GFP protein (Fig. 2E). Furthermore, compared to *actb2-as-P3* injection alone, its co-injection with 1 ng dSmR3nd-GFP protein could also compromise endogenous *actb2* mRNA degradation at 2.5 hpf (Fig. 2F). Even at 4 hpf, dSmR3nd-GFP could mitigate antisense probe-induced *actb2* mRNA degradation to a certain degree (Fig. 2G). These results imply that dSmR3nd-GFP protein bound to dsRNAs prevents dsRNA-induced mRNA degradation. Additionally, we found that over 75% of embryos injected with 300 pg *actb2-as-P3* probe alone or together with 1 ng dSmR3nd-mCherry at the one-cell stage did not show any detectable morphological changes as observed at the shield stage and 24 hpf (Fig. 2H), indicating that these biomolecules within the tested dose ranges may not affect embryonic development.

## Optimization of fluorescent RNA probes for binding to endogenous target mRNAs

To establish an mR3-based RNA tracking system, it is necessary to use an in vivo trackable antisense RNA probe that can efficiently bind to endogenous target mRNAs. We tested whether fluorescein-UTP labeled antisense *actb2* RNA probes would produce visible signals after binding to endogenous *actb2* mRNAs. We synthesized antisense (as-) and sense (s-) probes derived from P1, P2 or P3 region of *actb2* (Fig. S1B), each in three tandem repeats (3x), using fluorescein-UTPs. The antisense probes could be able to bind endogenous *actb2* mRNAs through sequence complementarity; in contrast, the sense probes should not do so and can thus serve as controls. These RNA probes were individually injected into one-cell stage embryos at a dose of 300 pg per embryo and fluorescence was observed at the 4-cell stage by confocal microscopy. As shown in Fig. 3A, the injected sense probes gave rise to powder-like (diffuse) signals with very few larger, brighter puncta in the cytosol, whereas injection with any antisense probe often generated many more puncta in the cytosol (Fig. 3A, B). Among different antisense probes, the *actb2-as-P3* probe gave rise to the highest number of puncta. Currently, we don't know why antisense probes produce some larger puncta. It is likely that three copies of the antisense sequence in one antisense probe molecule simultaneously associate with three target mRNAs and the aggregation results in conformational change of the probe molecule, which may bring fluorescein groups together for brighter fluorescence. To verify whether the puncta were dsRNAs, we performed immunofluorescence assay with dsRNA antibody after sense or antisense *actb2-P3* probe injection. Results showed that over 50% of fluorescent puncta from antisense *P3* probe were captured by dsRNA antibody and none of fluorescent puncta (very few) from sense *P3* probe was immunostained by dsRNA antibody (Fig. 3C), which confirms that the antisense fluorescent probe is capable of binding to endogenous target mRNAs to form larger, visible puncta. However,



still a great proportion of antisense probe puncta were not recognized by dsRNA probes, and those puncta may represent probe aggregates with short complementary sequences that may not be bound by dsRNA antibody.

To further confirm the targeting specificity of antisense probes, we chose another two maternally expressed genes, *eomesa* and *ybx1*, for which maternal and zygotic (MZ) mutants have been generated (Sun et al., 2018) (Shen W, unpublished data). In MZ*eomesa* or MZ*ybx1* embryos, mRNA levels of the mutant genes were extremely low when compared to wildtype embryos (Fig. 3D, E). We synthesized fluorescein-UTP labeled antisense probes, two for each gene (100 nt-long, see sequences in Table S2), and injected them into the one-cell stage embryos (Fig. 3D, E). As expected, the antisense probes generally gave rise to significantly more fluorescent puncta in wildtype embryos than in MZ mutants at the 4-cell stage (Fig. 3D-F). Thus, fluorescent antisense probes could form dsRNAs with the target mRNAs in embryos with considerable specificity.

We also investigated the effect of probe length and copy number as well as nucleotide modifications on in vivo targeting efficiency. We tested fluorescein-UTP labeled antisense probes targeting 3'UTR of endogenous *actb2* mRNAs, P3, P6 and P8 (see Fig. S1B), which were different in length and modification (with or without 2'-F-dCTP and 2'-F-dUTP). Results showed that single copy 100 nt-long P3 probe and 50 nt-long P6 probes gave rise to more large fluorescent puncta than 30 nt-long P8 probe, and that 3xP3 probe containing three tandem copies produced more large puncta than 1xP3 probe (Fig. 3G, H). It was reported that 2'-Fluorine modification could increase the stability of RNA (Deleavey and Damha, 2012). However, we found that incorporation of 2'-F-dCTP and 2'-F-dUTP (2'-F) into fluorescent probes failed to produce more and brighter puncta (Fig. 3G, H), implying that these modifications may not improve the probe stability and accessibility to the target in zebrafish embryos. Besides, co-injection of P5, P6 and P7, all in single copy but each targeting different

sequences, could increase the puncta number (Fig. 3I), suggesting that several probes targeting the same target mRNA can be used together to increase the signals.

### Tracking of endogenous mRNAs with antisense probe and dSmR3nd protein

As demonstrated above, fluorescein-labeled antisense probes can bind to endogenous target mRNAs to form dsRNAs and the dsRNAs can be bound by dSmR3 with a fluorescent protein tag. We next set out to develop a dual color-based RNA tracking system using fluorescein-labeled antisense RNA probe and dSmR3nd-mCherry protein, which may increase the tracking specificity. To do this, one cell-stage embryos were first injected with fluorescein-labeled antisense or sense *actb2* 3xP3 probe (300 pg per embryo) and then with dSmR3nd-mCherry protein (1 ng per embryo). The injected embryos were observed at the 4-cell stage by confocal time-lapse imaging. As shown in Fig. 4A, dSmR3nd-mCherry was mainly accumulated in the nucleus because it contains an NLS (Fig. 1F). When *actb2-as-P3* probe was co-injected (Fig. 4A, C, D; Fig. S2A, and Movie S1), large fluorescein-positive or dSmR3nd-mCherry-positive puncta were clearly seen in the cytosol; nearly 20% of probe-positive puncta were also positive for dSmR3nd and approximately 60% of dSmR3nd-positive puncta were positive for the fluorescent probe. Importantly, the dual color-labeled puncta moved without color separation during a time window of several minutes, strongly suggesting that dSmR3nd-mCherry protein and antisense *actb2-as-P3* probe were assembled in the same complex. When *actb2-s-P3* probe was co-injected (Fig. 4A, C, D; and Fig. S2B, Movie S2), in contrast, we did not see large dSmR3nd-mCherry-positive puncta in the cytosol or large double positive puncta. Similar phenomena were observed when dSmR3nd-mCherry protein was co-injected with *actb2* antisense or sense *P5/6/7* probe mix (Fig. 4B, C, D; and Fig. S3, Movie S3, S4). These results suggest that dSmR3nd protein is capable of binding to some of the forming dsRNAs, allowing tracking of dynamics of endogenous mRNAs. The

dSmR3nd-mCherry-positive but probe-negative puncta in the cytosol may arise from aggregation of dSmR3nd-mCherry proteins that dissociate from the probes.

As the cells divide fast during early development in the zebrafish embryo, the injected antisense probe would be diluted during cell cleavage, making it inefficient to track endogenous mRNAs in embryos at later stages. To tackle this problem, we tried to use a plasmid DNA that can continuously express an antisense probe in vivo under the control of the *U6* promoter. We injected one-cell stage embryos with 1 ng purified dSmR3nd-mCherry protein and 20 pg plasmid DNA that could express *actb2* sense or antisense *1xP3* probe and GFP marker (Fig. 4E, top left map). The plasmid-injected embryos developed normally as evidenced by normal morphology (Fig. 4F). As observed by confocal microscopy at the shield stage, puncta positive for dSmR3nd-mCherry were found in the cytosol in embryos with antisense probe expression (GFP-positive) but rarely seen in embryos with sense probe expression (Fig. 4G). We could continuously observe the nuclear export and movement in the cytosol of *actb2* mRNAs represented by dSmR3nd-mCherry positive puncta (Fig. 4H; Movie S5). To confirm that puncta are dsRNAs, we injected embryos with a single plasmid that could simultaneously express dSmR3nd-mCherry as well as *actb2* sense or antisense *1xP3* probe (Fig. 4E, top right map) and collected embryos at the shield stage for immunofluorescence with mCherry and dsRNA antibodies. Immunofluorescence results showed that cytosolic puncta positive for dSmR3nd-mCherry were mostly also positive for dsRNA when antisense *P3* probe (but not sense probe) was co-expressed (Fig. 4I, K). We further tested whether the mR3/dsRNA approach could be used to track endogenous *chordin* (*chd*) mRNAs that are specifically expressed in the zebrafish dorsal organizer at the onset of gastrulation (Schulte-Merker et al., 1997). When the *chd* antisense probe was co-expressed with dSmR3nd-mCherry from a single plasmid (Fig. 4E, bottom maps), puncta positive for mCherry and dsRNA, revealed by immunostaining, were detected in the cytosol of dorsal

cells in shield stage embryos (Fig. 4J, K). These results indicate that continuous supply of an antisense probe and dSmR3nd with a fluorescent protein tag could allow visualization of dynamics of an endogenous mRNA during gastrulation stages.

The MCP/MS2 system has been successfully used for RNA tracking (Bertrand et al., 1998; Campbell et al., 2015; Lionnet et al., 2011; Lucas et al., 2013; Park et al., 2014; Yoon et al., 2016). We wondered whether MCP/MS2-tracked RNA could also be followed by mR3/dsRNA labeling. To test this idea, we synthesized an antisense RNA probe (*actb2* P3-MS2) consisting of *actb2* 3xP3 and six copies of MS2 aptamers without fluorescein labeling (Fig. 5A). The *actb2* P3-MS2 probe was co-injected with purified dSmR3nd-mCherry and MCP-GFP proteins. dSmR3nd-mCherry could bind to dsRNAs forming between *actb2* P3-MS2 probe and endogenous *actb2* mRNA, and MCP-GFP could bind to the MS2 aptamers within the probe. Confocal microscopic live imaging detected dSmR3nd-mCherry positive as well as MCP-GFP positive puncta in the cytosol (Fig. 5B). More MCP-GFP positive signals were seen, which was expectable because MCP-GFP may bind to *actb2* P3-MS2 probes that did not form dsRNA with endogenous *actb2* mRNAs. Importantly, more than 60% of dSmR3nd-mCherry positive puncta were co-localized with MCP-GFP positive puncta, which moved together over time (Fig. 5C, and Movie S6). This result suggests that tracking effectiveness of dsRNAs by dSmR3nd is somewhat comparable to that of MS2 by MCP.

## DISCUSSION

In this study, we have established a real-time RNA tracking system by taking advantage of high dsRNA-binding ability of inactive mini-III RNase from *Staphylococcus epidermidis*, dSmR3. This mR3/dsRNA system consists of two parts: tandem repeat dSmR3 with an NLS and a fluorescent protein tag, which binds to dsRNAs, and fluorescein-labeled antisense RNA probe, which binds to and forms dsRNA with endogenous mRNAs. We have demonstrated

that this new system can be used to visualize dynamics of endogenous, non-engineered maternal or zygotic mRNAs in zebrafish embryos. The MCP/MS2 RNA tracking system usually needs to generate transgenic line to engineer MS2 aptamers into the target mRNA, which may take half a year in the zebrafish. In contrast, the mR3/dsRNA system has no need of time-consuming mRNA engineering, making it easier to track any target mRNAs in live cells or organisms.

Theoretically, fluorescent RNA probes alone could be used to in vivo track target mRNAs. However, this approach is practically troublesome because too much long dsRNAs can induce non-specific mRNA degradation and ultimately cause cell death in organisms (Oates et al., 2000; Zhao et al., 2001). We have demonstrated that injection of antisense probes into embryos indeed results in a significant decrease of target mRNA levels, but this effect could be prevented by co-injection of dSmR3nd (Fig. 2E-G). Therefore, it is recommended that antisense probe and dSmR3nd should be combined for in vivo mRNA tracking. We note that the antisense probe sequence may influence the target recognizing efficiency (Fig. 3B, F). To track a specific mRNA, therefore, several antisense RNA probes need to be tested first. Binding of antisense probes to the 5'UTR or the coding region of the target mRNA is expected to affect translation, therefore, it would be better to design probes targeting the 3'UTR of a target mRNA. However, some regions of the 3'UTR may also be involved in translation, location or other processes of an mRNA; thus, probes targeting different regions should be tested. Given that exogenous antisense RNA probes may be quickly exhausted due to degradation and cell proliferation-caused dilution, in vitro synthesized RNA probes can only be used to track endogenous mRNAs for a short time during embryonic development. However, continuous supply of antisense RNA probes as well as dSmR3nd protein can be achieved by promoter-driven gene expression. It is very important that, whatever a synthetic antisense probe or transgenic antisense probe is used, a sense probe should be included as

a control to evaluate the tracking specificity; and if possible, wild-type and mutant organisms/cells should be compared.

Natural dsRNAs, like dsRNAs formed between miRNAs and their target mRNAs, exist in live organisms. However, endogenous functional dsRNAs are usually destroyed or protected by endogenous dsRNA-binding proteins such as Dicer and Adar (Saunders and Barber, 2003), which might make them inaccessible to mR3 protein. We observed that dSmR3nd protein scarcely gave rise to puncta in the cytosol in the absence of exogenous antisense probes (Fig. 4), which suggests that its tracking specificity is not compromised by natural dsRNAs. As we demonstrated in case of *actb2* mRNA tracking, 30 nt-long antisense probes are inefficient for mR3-based tracking compared to 100 nt- or 50 nt-long probes (Fig. 3G, H). Since most of endogenous dsRNAs are short, like miRNAs, which are 20-25 nt in length, they may not be efficiently bound by mR3 protein. We suggest that the mR3/dsRNA system should avoid using short probes.

It is worth noting that the number of tracked mRNA molecules (puncta) by mR3/dsRNA labeling was not as high as expected, which may be due to inefficient binding between antisense probe and complementary target mRNA or between mR3 protein and dsRNAs. This imperfection currently makes it less effective to track an mRNA that is present in small amount in cells. This prototype of the system leaves space for future improvements. For instance, its tracking efficiency could be improved by increasing dsRNA-binding ability of dSmR3 via mutagenesis, by optimizing the antisense RNA probe, or by using better imaging equipment; the specificity may be improved by using a longer antisense probe or a probe consisting of several sequences targeting different regions of the target mRNA.

## MATERIALS AND METHODS

### Zebrafish strain

Zebrafish Tübingen strain was used in this study. *ybx1<sup>tsu3d5i</sup>* mutant line was described as before (Sun et al., 2018) and *eomesa<sup>tsu007</sup>* mutant line was generated by Cas9 technology for another project (Shen W et al., unpublished data). Embryos were raised at 28.5°C in Holtfreter's buffer and staged according to previous description (Kimmel et al., 1995). Ethical approval was obtained from the Animal Care and Use Committee of Tsinghua University.

### Protein expression and purification

The mR3 genes from 12 bacterial strains were synthesized by GenScript (see Table S1 for protein sequences of their inactive forms). The coding sequence of each mR3 gene was cloned into pET30b vector with 6x-His tag to the C-terminal and flag tag to the N-terminal by enzymatic assemble method (Gibson et al., 2009). The plasmid was transformed into *E. coli* BL21 (DE3) competent cells. Expression and purification of inactive mR3 proteins were performed essentially as described by Glow et al. (Glow et al., 2015). Briefly, protein expression was induced with 1 mM isopropyl  $\beta$ -D-1-thiogalactopyranoside (IPTG) when the bacteria were grown to mid-long stage, followed by growth at 16°C for at least 16 h. The bacterial cells were collected by centrifugation at 5,000 g for 10 min and suspended with L0 buffer (50 mM sodium phosphate dibasic, pH 8.0, 300 mM NaCl, 10 mM imidazole) with fresh addition of 10 mM 2-mercaptoethanol and 1 mM phenylmethylsulfonyl fluoride (PMSF). The cells were lysed by sonication for 30 min with a 3 s on/5 s off cycle. Insoluble materials were removed by centrifugation at 14,000 g for 1 h at 4°C. The supernatant was incubated with Ni-NTA agarose (Qiagen, 30210) for at least 2 h at 4°C with gentle rotation. The protein-agarose complex was washed with L1 buffer (L0 buffer supplemented with 2 M NaCl) and L2 buffer

(L0 buffer supplemented with 20 mM imidazole) in order for several times. Finally, the protein was eluted with elution buffer (L0 buffer supplemented with 250 mM imidazole).

Proteins for ELISA were applied to dialysis buffer (20 mM Tris-HCL, pH 8.0, 200 mM KCL, 10 mM MgCl<sub>2</sub>) and concentrated by ultrafiltration (Merck Millipore). For *in vivo* injection, the eluted protein was further purified with iron exchange chromatography and size exclusion chromatography (GE Healthcare). The fractions containing desired proteins were concentrated by ultrafiltration. The concentration of proteins was measured with BCA protein assay kit (Beyotime, P0012). The purified proteins were used to run SDS-PAGE gel to determine the homogeneity.

### **Probe, mRNA and dsRNA synthesis**

Antisense sequences each was cloned into pXT7 vector which has the T7 promoter to the upstream and the SP6 promoter to the downstream. Primers used for probe synthesis were listed in Table S2. The plasmid was linearized by restriction endonuclease and transcribed with MEGAscript™ T7 Transcription Kit (Invitrogen, AM1334) or MEGAscript™ SP6 Transcription Kit (Invitrogen, AM1330) following the manufacturer's instruction. To generate biotin-labeled probes, *in vitro* transcription system was adjusted to contain 1.5 µL biotin-UTP (Roche, 11388908910), NTPs (7.5 mM ATP, CTP, GTP and 1.875 mM UTP), transcription buffer and RNA polymerase. To obtain fluorescent probe, fluorescein RNA labelling mix was used. For fluorescent 2'-Fluorine labeled probes, DuraScribe® T7 Transcription Kit (Epicenter, No. DS010925), which includes 2'-dCTP and 2'-F-dUTP, was used according to the manufacturer's manual with supplement of fluorescein-UTP. To obtain mRNA for translation, mMESSAGE mMACHINE™ SP6 Transcription Kit (Invitrogen, AM1340) was used following the manufacturer's instruction. The *in vitro* transcribed probes or mRNAs were treated with DNase I to digest DNA template and cleaned up with mirVana miRNA Isolation Kit (Invitrogen,



AM1561, for probe purification) or RNeasy Mini Kit (QIAGEN, for mRNA purification) following the manufacturer's instruction.

To obtain dsRNA, the reaction system containing 1 µg of complementary single stranded RNA (ssRNA, sense and antisense) and 80 mM KCl was annealed at 70°C for 5 min and placed at 37°C overnight. After synthesis, NaCl was added to a final concentration of 1.5 M, KCl to 20 mM, then added RNase A (Fermentas, EN0531) to digest the remaining ssRNA for 15 min at 37°C. The synthesized dsRNA was precipitated with phenol-chloroform-isopropanol at -80°C for several hours and centrifuged at 14,000 g for 30min, washed with 75% ethanol, dried and dissolved in nuclease free water.

## ELISA

Flag antibody (MBL-3L) was diluted with antibody coating buffer (carbonate buffer, pH 9.6) to 1 µg/mL to cover the 96-well plate at 4°C overnight. The coated plate was washed with PBST (PBS supplied with 1‰ Tween-20) to remove the unbound antibody. Purified inactive mR3 proteins were firstly diluted with storage buffer (50 mM Tris-HCl, pH 8.0, 300 mM NaCl) (Glow et al., 2015), followed by dilution with PBST to reaction concentration (0.8 µM for monomer proteins, 0.4 µM for dimer proteins). The diluted proteins were covered to antibody coated plate to incubate for 2 h at room temperature, followed by washing with PBST. Biotin-labeled dsRNAs were diluted with LSB (10 mM Tris-HCl pH 7.5, 5 mM NaCl, 1 mM MgCl<sub>2</sub>, 0.1 mg/mL BSA) or HSB (20 mM HEPES-KOH pH 7.5, 140 mM KCl, 12 mM NaCl, 2 mM MgCl<sub>2</sub>, 5% glycerol) to 0.02 µM to bind with coated inactive mR3 proteins for 1 hour at 37°C, followed by washing with PBST and incubating with Streptavidin-HRP antibody (Abcam, ab7403) at 4°C overnight. After incubation and wash, the plate was stained with TMB Chromogen Solution (Beyotime, P0209) at 28.5°C. After sufficient color development, the staining reaction was stopped with 2 M H<sub>2</sub>SO<sub>4</sub>. The staining result was read out by microplate reader (EnSpire, PerkinElmer) at 450 nm.

## RNA immunoprecipitation

RNA immunoprecipitation was carried out as previously described (Niranjanakumari et al., 2002) with minor modifications. One-cell stage embryos were injected with *RSGM* mRNA, antisense *gfp* probe and dSmR3nd-GFP protein and were dechorionated with pronase at the 256-cell stage, followed by fixation with 1% formaldehyde (Sigma-Aldrich, F8775-25ML) in Holtfreter's buffer for 10 min at room temperature. After fixation, glycine was added to a final concentration of 80 mM and incubated for 5 min at room temperature to quench the crosslink. Embryos were transferred to centrifuge tube and washed with ice-cold PBS buffer with slight pipetting to remove the yolk, followed by centrifugation at 800 g for 3 min to pellet cells. Samples were resuspended with 2 mL RIPA buffer (10 mM Tris-HCl, pH7.5, 1% Nonidet P-40, 0.5% sodium deoxycholate, 0.05% SDS, 1 mM EDTA, 150 mM NaCl) containing RNaseOUT inhibitor (Invitrogen, 10777019) and protease inhibitor (Roche), and lysed by sonication for 2 min with a 9.9 s on/9.9 s off cycle. Insoluble material was removed by centrifugation at 14,000 g for 10 min at 4°C. 100 µL of the supernatant was saved for input.

Protein A-Sepharose beads (Life Technologies) were pre-washed with RIPA buffer twice and pelleted by centrifugation at 800 g for 3 min. Beads were resuspended with 400 µL RIPA buffer and incubated with GFP antibody (Abcam, ab290) for 2 h at 4°C, followed by washing with RIPA buffer containing RNaseOUT inhibitor and protease inhibitor. Beads-antibody pellet was resuspended the with 400 µL embryo lysate and incubated with gentle rotation at 4°C overnight. The beads were pelleted with centrifugation at 800 g for 4 min, washed with RIPA buffer containing Tween-20 for 5 times, resuspended in elution buffer (50 mM Tris-HCl, pH7.0, 5 mM EDTA, 10 mM DTT, 1% SDS) and incubated at 70°C for 45 min to reverse formaldehyde crosslink. RNA was extracted with TRIzol reagent (Thermo Fisher Scientific) following the manufacturer's instruction. Purified RNA was reversely transcribed into cDNA using random

primers and GoScript™ reverse transcription mix (Promega, A2790) and quantified with qPCR.

### **qRT-PCR**

Total RNA was extracted with RNeasy Mini kit (Qiagen) from embryos at desired stages and reversely transcribed into cDNA with GoScript™ reverse transcription mix according to the manufacturer's instructions. For quantifying remaining probes in embryos (Fig. 2D), purified RNAs were intramolecularly ligated using RNA ligase to form circular RNAs. Primers used for qRT-PCR were listed in Table S2.

### **Immunofluorescence**

Immunofluorescence was performed as before (Wu et al., 2018) using the following antibodies: anti-dsRNA (Merck millipore, MABE1134), anti-mCherry (EASYBIO, BE2027), anti-GFP (Abcam, ab13970).

### **Embryo imaging and image processing**

For live imaging, embryos developed to desired stages were embedded in 0.8% low melting agarose for observation and imaged by Nikon A1Rsi laser scanning confocal microscopy. The excitation light wavelengths were 488 nm and 561 nm. Scanning mode was chosen as "line wise" to avoid emission crosstalk. The acquired images were processed with Imaris 9.0.1 (Bitplane) software and photoshop CC. Desired information (dsRNA number, Pearson's correlation and fluorescent intensity) were analyzed with NIS-element software or Imaris 9.0.1 (Bitplane) software.

## Statistical analysis

An average from multiple samples was presented as mean  $\pm$  S.E.M., significance between groups were analyzed with Welch's *t*-test.

## Acknowledgement

We thank Prof. Janusz M. Bujnicki (Adam Mickiewicz University) for kindly providing the plasmid pETBsu. We thank all members in Meng laboratory for discussion, suggestion and technical assistance. We are grateful to members in SLSTU-Nikon Biological Imaging Center, Tsinghua University, for providing help on image acquisition and processing.

## Competing interests

The authors declare no competing or financial interests.

## Author contributions

L.Z. performed most of experiments and data analysis. L.C. participated in cloning and expression of mini-III RNases. J.C. and W.S. helped perform some experiments. A.M. and L.Z. designed the study, interpreted results and wrote the manuscript. A.M. supervised the project.

## Funding

This work was financially supported by National Natural Science Foundation of China (#31590832 and #31988101 to A.M.).

## Supplementary information

Supplementary information includes three figures, six movies and two tables.

## References

- Abudayyeh, O.O., Gootenberg, J.S., Essletzbichler, P., Han, S., Joung, J., Belanto, J.J., Verdine, V., Cox, D.B.T., Kellner, M.J., Regev, A., *et al.* (2017). RNA targeting with CRISPR-Cas13. *Nature* **550**, 280-284.
- Abudayyeh, O.O., Gootenberg, J.S., Konermann, S., Joung, J., Slaymaker, I.M., Cox, D.B., Shmakov, S., Makarova, K.S., Semenova, E., Minakhin, L., *et al.* (2016). C2c2 is a single-component programmable RNA-guided RNA-targeting CRISPR effector. *Science* **353**, aaf5573.
- Bertrand, E., Chartrand, P., Schaefer, M., Shenoy, S.M., Singer, R.H., and Long, R.M. (1998). Localization of ASH1 mRNA particles in living yeast. *Mol Cell* **2**, 437-445.
- Bratu, D.P., Cha, B.J., Mhlana, M.M., Kramer, F.R., and Tyagi, S. (2003). Visualizing the distribution and transport of mRNAs in living cells. *Proceedings of the National Academy of Sciences of the United States of America* **100**, 13308-13313.
- Campbell, P.D., Chao, J.A., Singer, R.H., and Marlow, F.L. (2015). Dynamic visualization of transcription and RNA subcellular localization in zebrafish. *Development* **142**, 1368-1374.
- Cheong, C.G., and Hall, T.M. (2006). Engineering RNA sequence specificity of Pumilio repeats. *Proc Natl Acad Sci U S A* **103**, 13635-13639.
- Court, D.L., Gan, J., Liang, Y.H., Shaw, G.X., Tropea, J.E., Costantino, N., Waugh, D.S., and Ji, X. (2013). RNase III: Genetics and function; structure and mechanism. *Annu Rev Genet* **47**, 405-431.
- Deleavey, G.F., and Damha, M.J. (2012). Designing chemically modified oligonucleotides for targeted gene silencing. *Chem Biol* **19**, 937-954.
- Gibson, D.G., Young, L., Chuang, R.Y., Venter, J.C., Hutchison, C.A., 3rd, and Smith, H.O. (2009). Enzymatic assembly of DNA molecules up to several hundred kilobases. *Nat Methods* **6**, 343-345.

- Glow, D., Kurkowska, M., Czarnecka, J., Szczepaniak, K., Pianka, D., Kappert, V., Bujnicki, J.M., and Skowronek, K.J. (2016). Identification of protein structural elements responsible for the diversity of sequence preferences among Mini-III RNases. *Sci Rep* 6, 38612.
- Glow, D., Pianka, D., Sulej, A.A., Kozłowski, L.P., Czarnecka, J., Chojnowski, G., Skowronek, K.J., and Bujnicki, J.M. (2015). Sequence-specific cleavage of dsRNA by Mini-III RNase. *Nucleic Acids Res* 43, 2864-2873.
- Johnstone, O., and Lasko, P. (2001). Translational regulation and RNA localization in *Drosophila* oocytes and embryos. *Annu Rev Genet* 35, 365-406.
- Kimmel, C.B., Ballard, W.W., Kimmel, S.R., Ullmann, B., and Schilling, T.F. (1995). Stages of embryonic development of the zebrafish. *Dev Dyn* 203, 253-310.
- King, M.L., Messitt, T.J., and Mowry, K.L. (2005). Putting RNAs in the right place at the right time: RNA localization in the frog oocyte. *Biol Cell* 97, 19-33.
- Lang, F. (2007). Mechanisms and significance of cell volume regulation. *J Am Coll Nutr* 26, 613S-623S.
- Larson, D.R., Zenklusen, D., Wu, B., Chao, J.A., and Singer, R.H. (2011). Real-time observation of transcription initiation and elongation on an endogenous yeast gene. *Science* 332, 475-478.
- Lionnet, T., Czaplinski, K., Darzacq, X., Shav-Tal, Y., Wells, A.L., Chao, J.A., Park, H.Y., de Turris, V., Lopez-Jones, M., and Singer, R.H. (2011). A transgenic mouse for in vivo detection of endogenous labeled mRNA. *Nat Methods* 8, 165-170.
- Lucas, T., Ferraro, T., Roelens, B., De Las Heras Chanes, J., Walczak, A.M., Coppey, M., and Dostatni, N. (2013). Live imaging of bicoid-dependent transcription in *Drosophila* embryos. *Curr Biol* 23, 2135-2139.
- Masliyah, G., Barraud, P., and Allain, F.H. (2013). RNA recognition by double-stranded RNA binding domains: a matter of shape and sequence. *Cell Mol Life Sci* 70, 1875-1895.

- Nelles, D.A., Fang, M.Y., O'Connell, M.R., Xu, J.L., Markmiller, S.J., Doudna, J.A., and Yeo, G.W. (2016). Programmable RNA Tracking in Live Cells with CRISPR/Cas9. *Cell* 165, 488-496.
- Niranjanakumari, S., Lasda, E., Brazas, R., and Garcia-Blanco, M.A. (2002). Reversible cross-linking combined with immunoprecipitation to study RNA-protein interactions in vivo. *Methods* 26, 182-190.
- Oates, A.C., Bruce, A.E., and Ho, R.K. (2000). Too much interference: injection of double-stranded RNA has nonspecific effects in the zebrafish embryo. *Dev Biol* 224, 20-28.
- Ozawa, T., Natori, Y., Sato, M., and Umezawa, Y. (2007). Imaging dynamics of endogenous mitochondrial RNA in single living cells. *Nat Methods* 4, 413-419.
- Paige, J.S., Wu, K.Y., and Jaffrey, S.R. (2011). RNA mimics of green fluorescent protein. *Science* 333, 642-646.
- Paquin, N., and Chartrand, P. (2008). Local regulation of mRNA translation: new insights from the bud. *Trends Cell Biol* 18, 105-111.
- Park, H.Y., Lim, H., Yoon, Y.J., Follenzi, A., Nwokafor, C., Lopez-Jones, M., Meng, X., and Singer, R.H. (2014). Visualization of dynamics of single endogenous mRNA labeled in live mouse. *Science* 343, 422-424.
- Redko, Y., Bechhofer, D.H., and Condon, C. (2008). Mini-III, an unusual member of the RNase III family of enzymes, catalyses 23S ribosomal RNA maturation in *B. subtilis*. *Mol Microbiol* 68, 1096-1106.
- Saunders, L.R., and Barber, G.N. (2003). The dsRNA binding protein family: critical roles, diverse cellular functions. *FASEB J* 17, 961-983.
- Schulte-Merker, S., Lee, K.J., McMahon, A.P., and Hammerschmidt, M. (1997). The zebrafish organizer requires chordino. *Nature* 387, 862-863.
- Sun, J., Yan, L., Shen, W., and Meng, A. (2018). Maternal Ybx1 safeguards zebrafish oocyte

maturation and maternal-to-zygotic transition by repressing global translation. *Development* 145.

Tian, B., Bevilacqua, P.C., Diegelman-Parente, A., and Mathews, M.B. (2004). The double-stranded-RNA-binding motif: interference and much more. *Nat Rev Mol Cell Biol* 5, 1013-1023.

Tyagi, S., and Kramer, F.R. (1996). Molecular beacons: Probes that fluoresce upon hybridization. *Nature Biotechnology* 14, 303-308.

Vargas, D.Y., Raj, A., Marras, S.A., Kramer, F.R., and Tyagi, S. (2005). Mechanism of mRNA transport in the nucleus. *Proc Natl Acad Sci U S A* 102, 17008-17013.

Wang, X., McLachlan, J., Zamore, P.D., and Hall, T.M. (2002). Modular recognition of RNA by a human pumilio-homology domain. *Cell* 110, 501-512.

Wu, X., Shen, W., Zhang, B., and Meng, A. (2018). The genetic program of oocytes can be modified in vivo in the zebrafish ovary. *J Mol Cell Biol* 10, 479-493.

Yan, L., Chen, J., Zhu, X., Sun, J., Wu, X., Shen, W., Zhang, W., Tao, Q., and Meng, A. (2018). Maternal Hluwa dictates the embryonic body axis through beta-catenin in vertebrates. *Science* 362.

Yang, L.Z., Wang, Y., Li, S.Q., Yao, R.W., Luan, P.F., Wu, H., Carmichael, G.G., and Chen, L.L. (2019). Dynamic Imaging of RNA in Living Cells by CRISPR-Cas13 Systems. *Mol Cell* 76, 981-997 e987.

Yoon, Y.J., Wu, B., Buxbaum, A.R., Das, S., Tsai, A., English, B.P., Grimm, J.B., Lavis, L.D., and Singer, R.H. (2016). Glutamate-induced RNA localization and translation in neurons. *Proc Natl Acad Sci U S A* 113, E6877-E6886.

Zhao, Z., Cao, Y., Li, M., and Meng, A. (2001). Double-stranded RNA injection produces nonspecific defects in zebrafish. *Dev Biol* 229, 215-223.



## Figures

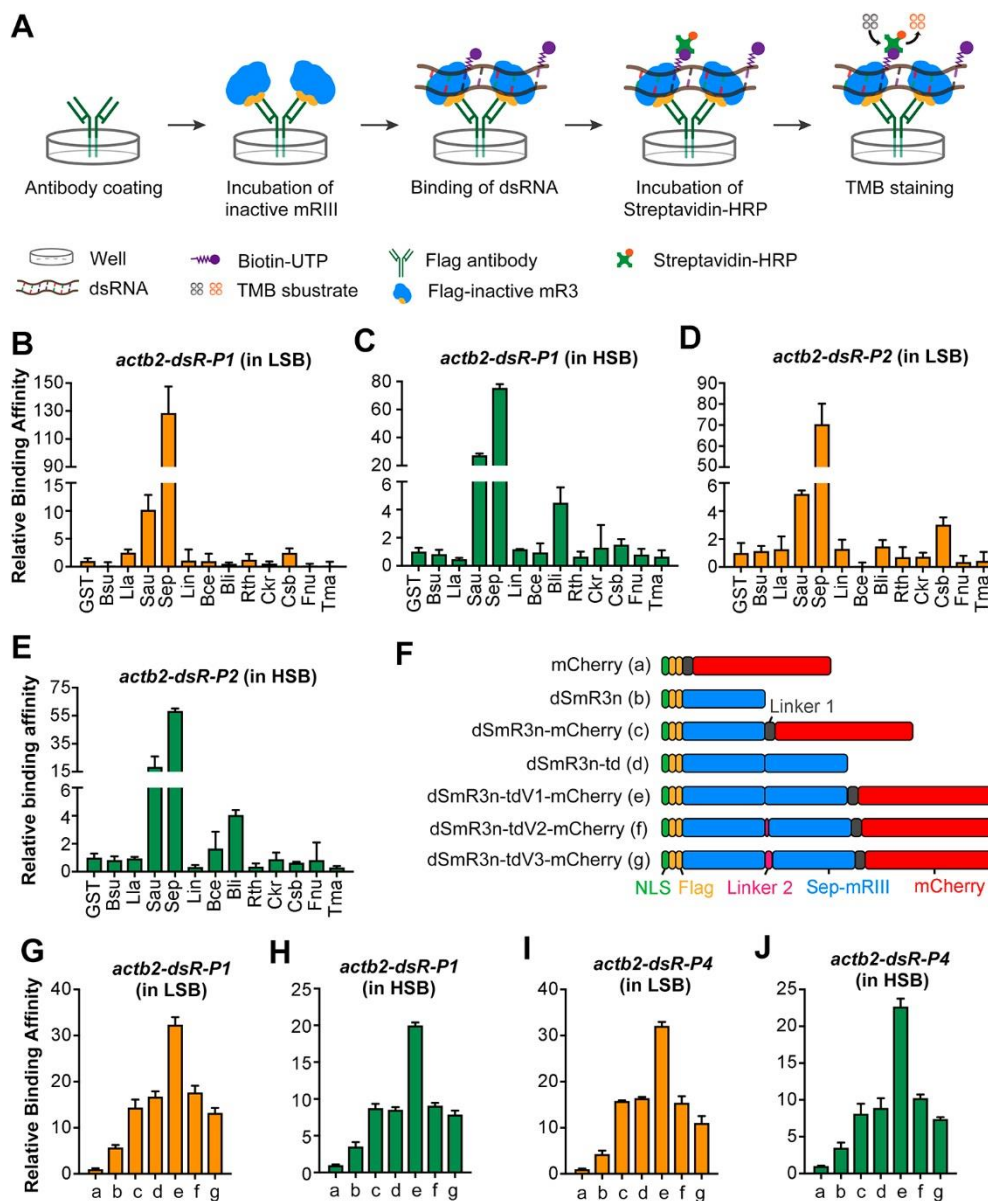

**Fig. 1. Screening of inactive mR3 proteins with high dsRNA-binding affinity.** (A) Scheme of ELISA to compare relative binding affinity of inactive mR3 proteins with biotin-labeled dsRNA. (B-E) Relative binding affinity of inactive mR3 proteins with *actb2-dsR-P1* or *actb2-dsR-P2* in LSB or HSB buffer. mR3 origins: *Bacillus subtilis* (Bsu), *Lactococcus lactis* (Lla), *Staphylococcus aureus* (Sau), *Staphylococcus epidermidis* (Sep), *Listeria innocua* (Lin), *Bacillus cereus* (Bce), *Bacillus licheniformis* (Bli), *Ruminiclostridium thermocellum* (Rth), *Caldicellulosiruptor kristjanssonii* (Ckr), *Caldanaerobacter subterraneus* (Csb),

*Fusobacterium nucleatum* (Fnu), *Thermotoga maritima* (Tma). GST served as the control protein. (F) Illustration of different forms of dSmR3. Full name of dSmR3nd: dead form of Sep-mR3 with nuclear localization signal in dimer. (G-J) Relative binding affinity of different dSmR3 forms. mCherry served as the control protein. The concentration of monomer protein used in ELISA is 0.8  $\mu$ M, dimer protein is 0.4  $\mu$ M, dsRNA is 0.02  $\mu$ M. All values are represented with mean  $\pm$  S.D. with three repetitive wells.

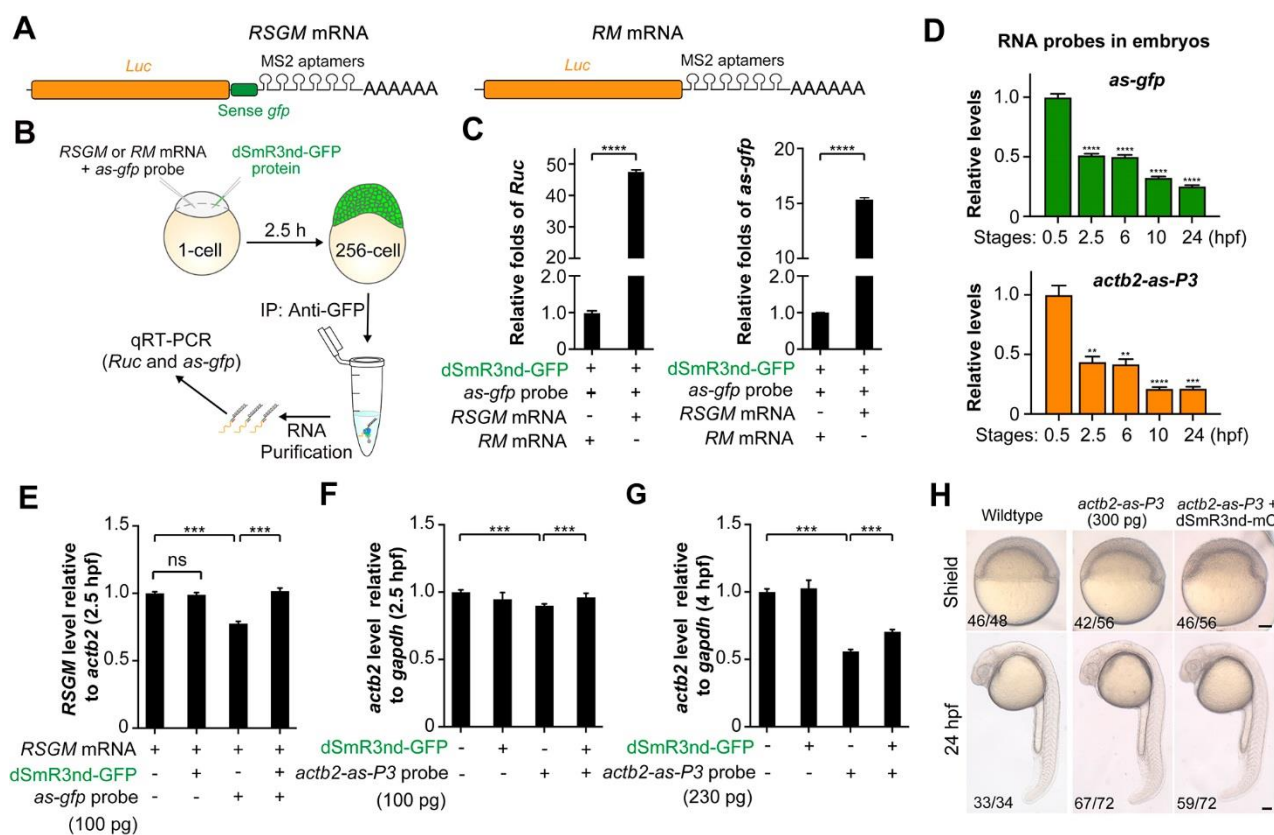

**Fig. 2. *In vivo* binding of dSmR3 with dsRNA and effect on target mRNA stability in zebrafish embryo.** (A) Illustration of RSGM and RM mRNA compositions. (B) Scheme of RNA immunoprecipitation. 300 pg RSGM or RM mRNA plus 350 pg *as-gfp* probe as well as 1 ng dSmR3nd-GFP protein were sequentially injected into one-cell stage embryos. The dose was the amount per embryo. Approximately 2,100 embryos each group were collected at the 256-cell stage for analysis. (C) qRT-PCR analysis of *Luc* (left) or *as-gfp* RNA (right) levels using dsRNA precipitate. (D) Degradation dynamics of injected antisense probes. The *actb2-as-P3* and *as-gfp* probes were injected, each at 100 pg per embryo, at 1-cell stage. About 40 embryos were collected at desired stages. Total RNA was intramolecularly ligated prior to qRT-PCR detection. (E-G) qRT-PCR analysis of exogenous *Luc* (E) or endogenous *actb2* (F, G) levels. One-cell embryos were injected with indicated materials and harvested at desired stages for analysis. Injection doses (per embryo): dSmR3nd-GFP protein, 1 ng; antisense RNA probes, 100 pg or 230 pg. (H) Normal development of

embryos injected with 300 pg *actb2-as-P3* alone or together with 1 ng dSmR3nd-mCherry (dSmR3nd-mC). Embryos were injected at the one-cell stage and imaged at the shield stage and 24 hpf. The ratio of embryos with representative morphology was indicated. Scale bars, 100  $\mu$ m. Significance levels: \*\*,  $p < 0.01$ ; \*\*\*,  $p < 0.001$ ; \*\*\*\*,  $p < 0.0001$ .

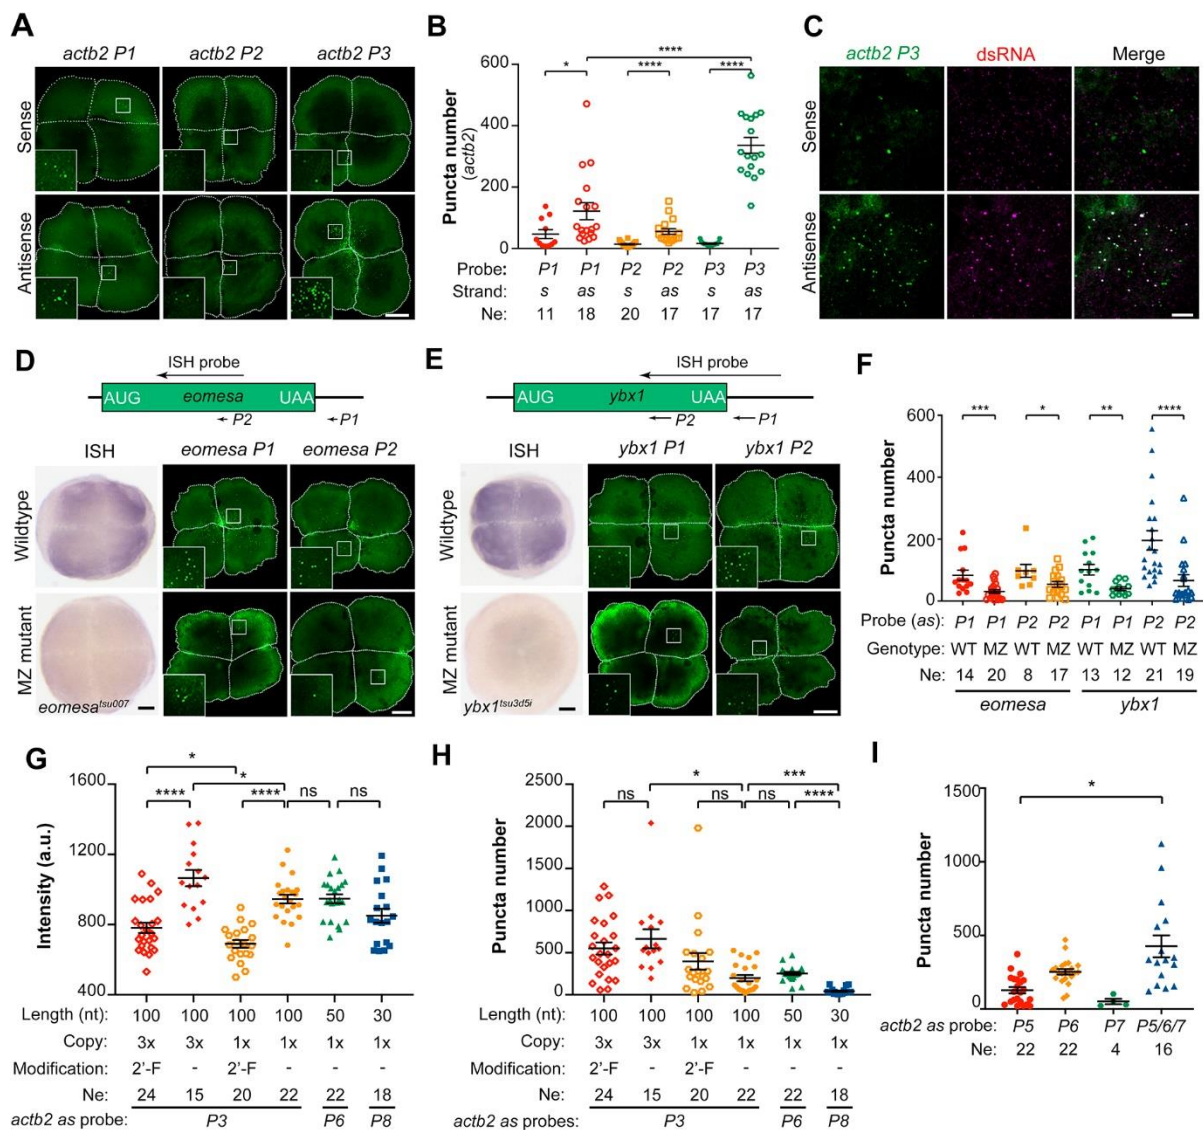

**Fig. 3. Targeting of endogenous mRNA by fluorescein-labeled antisense probes.** (A, B)

Detection of fluorescent puncta by different *actb2* probes. One-cell stage embryos were injected with 300 pg of indicated fluorescein-labeled probe and fixed at the 4-cell stage for confocal microscopic imaging. Representative images were animal-pole views (A) with the cell border demarcated by white-dashed line and magnification of the indicated area in the inset. The number of puncta (B) was calculated by NIS-element software under the same setting parameters. Each dot represented a single embryo. Ne, number of observed embryos. (C) *actb2* probe-induced puncta are mainly dsRNA-positive. Embryos were injected at the one-cell stage with 300 pg fluorescein-labeled sense or antisense *actb2* P3 probe and fixed

at the 4-cell stage for immunostaining with dsRNA antibody. (D, E) *eomesa* (D) or *ybx1* (E) antisense probe-induced puncta in wildtype or MZ mutants. Top, relative position and length of ISH probes and fluorescein-labeled antisense probes to the target mRNA. Bottom, ISH pictures and fluorescent confocal images with magnification of the indicated area in the inset. All were animal-pole views at the 4-cell stage. (F) Number of fluorescent puncta formed in WT or MZ*eomesa* or MZ*ybx1* embryos. (G-I) Intensity (G) or number (H, I) of fluorescent puncta induced by indicated *actb2* antisense probes. One-cell stage embryos were injected with 300 pg of indicated single probes or probe mix (100 pg each) and observed at the 4-cell stages. Scale bars in (A, D, E): 100  $\mu\text{m}$ ; in C: 10  $\mu\text{m}$ . In (B, F-I), each dot indicated one embryo; Ne, number of observed embryos. Statistical significance: ns, nonsignificant; \*,  $p < 0.05$ ; \*\*,  $p < 0.01$ ; \*\*\*,  $p < 0.001$ ; \*\*\*\*,  $p < 0.0001$ .



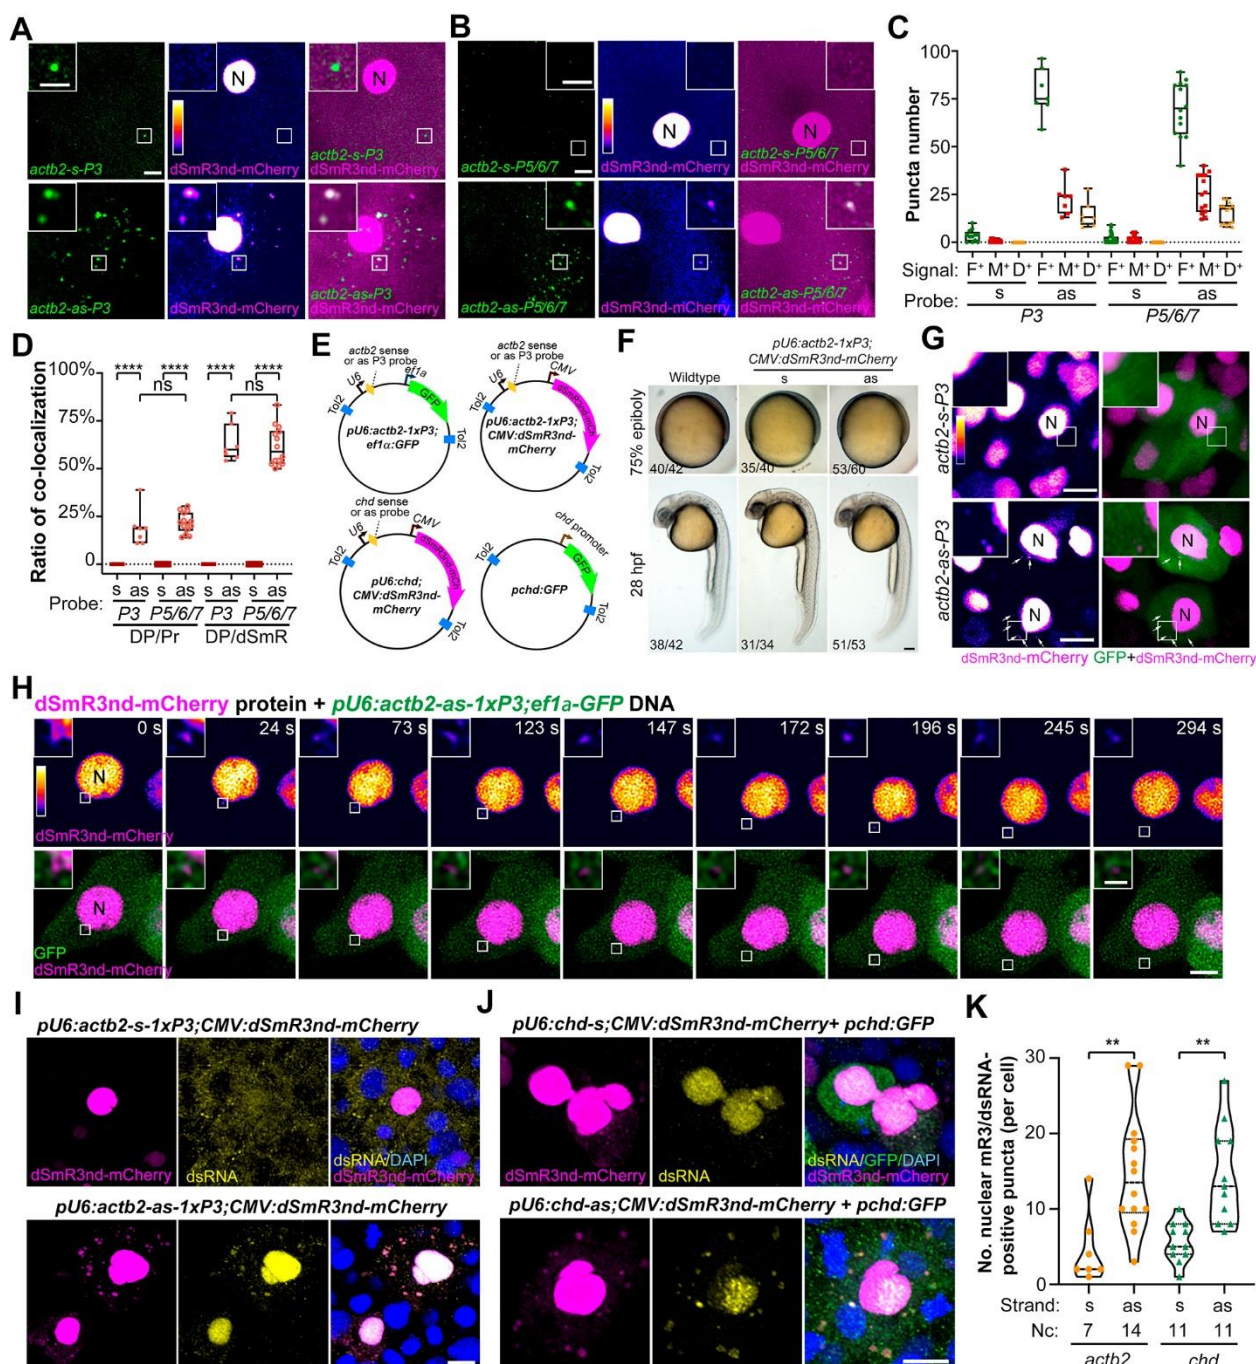

**Fig. 4. Tracking of endogenous mRNAs by dSmR3/antisense dual-color system.** (A, B) in vivo tracking of maternal *actb2* mRNA using dsmR3nd-mCherry together with single fluorescent *actb2* probe (A) or mixed probes (B). One-cell stage embryos were injected with 1 ng dSmR3nd-mcherry protein and 300 pg probe (for probes mix, 100 pg each) and imaged by confocal microscopy at the 4-cell stage. The boxed area was enlarged in the inset. N,

nucleus. Scale bars, 10  $\mu\text{m}$  (5  $\mu\text{m}$  in insets). (C) Total numbers of fluorescent probe puncta ( $F^+$ ), dSmR3 puncta ( $M^+$ ) and dSmR3/probe double positive puncta ( $D^+$ ) in the cytosol. Data were obtained from single views as exemplified in (A, B). (D) Ratios of dual color (co-localization) labeling. DP/Pr ratio: number of dual color puncta/number of probe positive puncta; DP/dSmR ratio: number of dual color puncta/number of dSmR3nd-mCherry positive puncta. The number of embryos used for statistics were 3 (*s-P3*, 12 live imaging time points), 1 (*as-P3*, 7 time points), 8 (*s-P5/6/7*, 34 time points) and 2 (*as-P5/6/7*, 14 time points). (E) Illustration of plasmids used for tracking of mRNAs at later stages. Tol2, *Tol2* transposon LTRs. *U6*, *ef1a* and *CMV* represented promoters. (F) Normal morphology of embryos injected with plasmids for RNA imaging. One-cell stage embryos were injected with plasmid *pU6:actb2-1xP3;CMV:dSmR3nd-mCherry* (20 pg per embryo) and observed at indicated stage. Scale bar, 100  $\mu\text{m}$ . (G, H) Tracking of *actb2* mRNA at the shield stage. One-cell stage embryos were injected with 1 ng dSmR3nd-mCherry protein and 20 pg *pU6:actb2-1xP3;ef1a:GFP* plasmid DNA and observed by confocal microscopy at 6 hpf. (G) Example of single embryos with multiple cells. Arrows indicated dSmR3nd-mCherry positive puncta in the cytosol. N, nucleus. Scale bar, 10  $\mu\text{m}$ . (H) Time-lapse live images of a single cell. Scale bar, 5  $\mu\text{m}$  (1  $\mu\text{m}$  in inset). See also Movie S5. (I-K) Tracking of *actb2* (I) and *chd* (J) mRNAs by promoter-driven expression of RNA probes and dSmR3nd-mCherry. One-cell stage embryos were injected with indicated plasmids, each at 20 pg per embryo, and collected at the shield stage for immunostaining with mCherry and dsRNA antibodies together with DAPI staining. Confocal images were shown in (I, J) and the number of mCherry/dsRNA double positive puncta in the cytosol was calculated (K). Note that, in (J), the weaker dsRNA signal in the mCherry-positive nucleus in the top panel in (J) compared to that in the bottom panel might be due to those cells in different phases of the cell cycle. Scale bars, 10  $\mu\text{m}$ . Nc, number of observed cells. \*\*,  $p < 0.01$ .



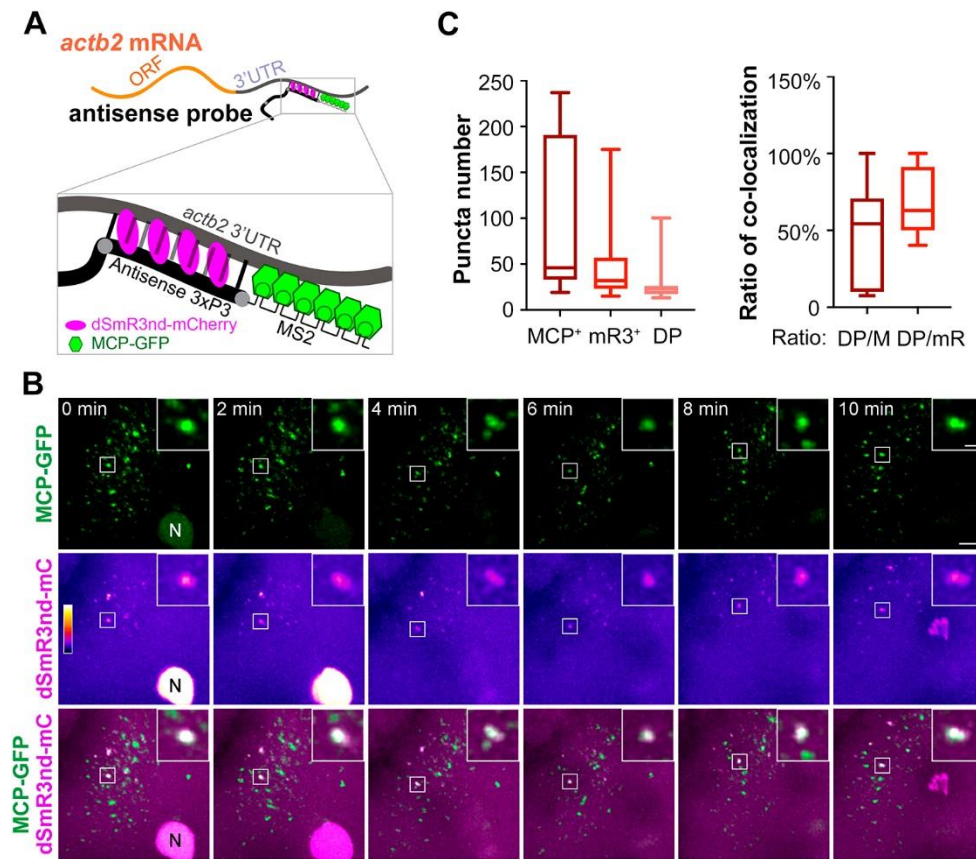

**Fig. 5. Dynamic tracking of endogenous *actb2* mRNA simultaneously using mR3/dsRNA and MCP/MS2 systems.** (A) Schematic model of mRNA tracking with the two systems. The antisense *actb2* 3xP3-MS2 probe contains 3xP3, which is complementary to and forms dsRNA with 3'UTR, and 6 repeats of MS2 aptamer, which can be recognized by MCP-GFP fusion protein. (B) Time-lapse live images of dual color-labeled RNA puncta. One-cell stage embryos were injected with 1 ng dSmR3nd-mCherry protein, 1 ng MCP-GFP protein and 300 pg antisense *actb2* 3xP3 MS2 probe and observed by confocal microscopy at the 4-cell stage. N, nucleus. Scale bars, 10  $\mu$ m (2  $\mu$ m in insets). See also Movie S6. (C) Number of fluorescent puncta (left) and ratio of co-localized puncta (right). Five embryos at 15 live imaging time points were used for calculation. DP/M, number of double positive puncta/number of MCP-GFP positive puncta; DP/mR, number of double positive puncta/number of dSmR3nd-mCherry positive puncta.

## Supplementary Information

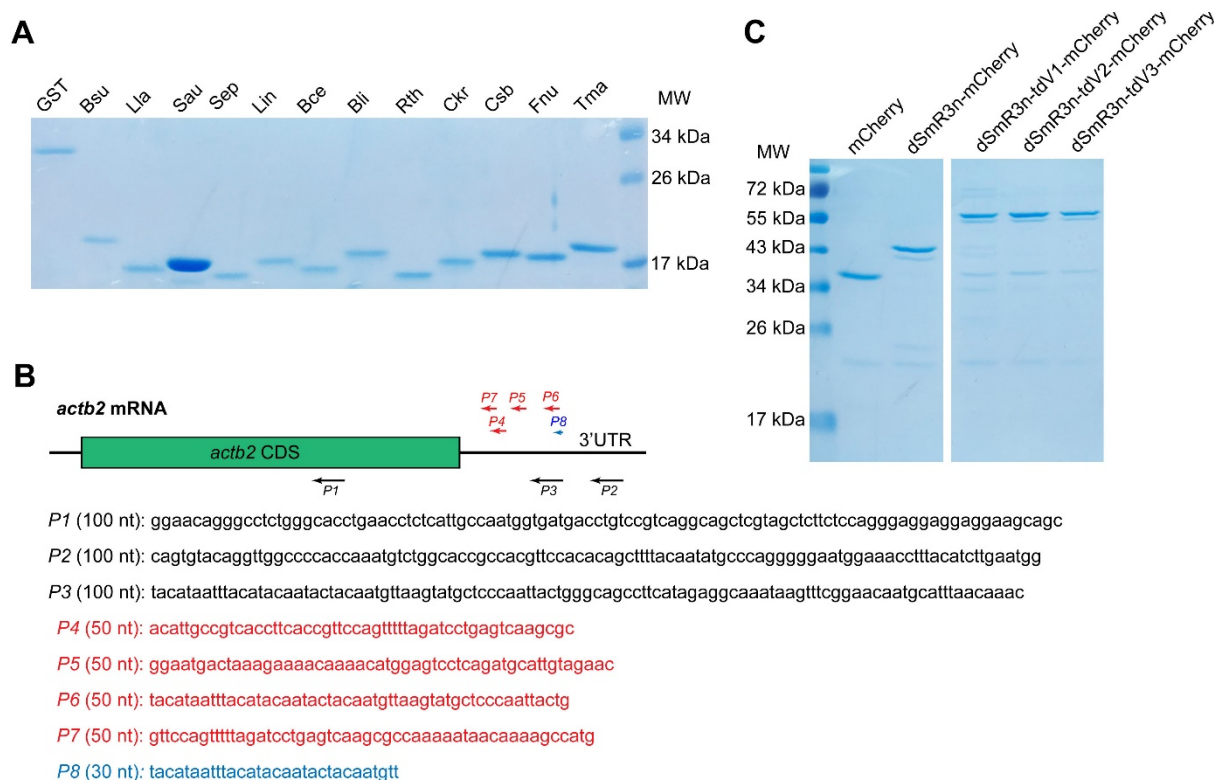

**Fig. S1. Purified mR3 proteins and sequence information of *actb2* probes.** (A) Examination of in vitro expressed and purified inactive mR3 proteins of different origins by Coomassie bright blue staining. Origins: *Bacillus subtilis* (Bsu), *Lactococcus lactis* (Lla), *Staphylococcus aureus* (Sau), *Staphylococcus epidermidis* (Sep), *Listeria innocua* (Lin), *Bacillus cereus* (Bce), *Bacillus licheniformis* (Bli), *Ruminiclostridium thermocellum* (Rth), *Caldicellulosiruptor kristjanssonii* (Ckr), *Caldanaerobacter subterraneus* (Csb), *Fusobacterium nucleatum* (Fnu), *Thermotoga maritima* (Tma). GST served as the control protein. MW, molecular weight markers. (B) Relative position, length and sequence of different antisense probes targeting to *actb2* mRNA. For making *actb2-dsR-P1*, *actb2-dsR-P2* or *actb2-dsR-P4* dsRNA, sense and antisense RNAs corresponding to the same region were synthesized and annealed in vitro. (C) Coomassie bright blue staining of different forms of dSmR3n protein. mCherry served as the control protein.

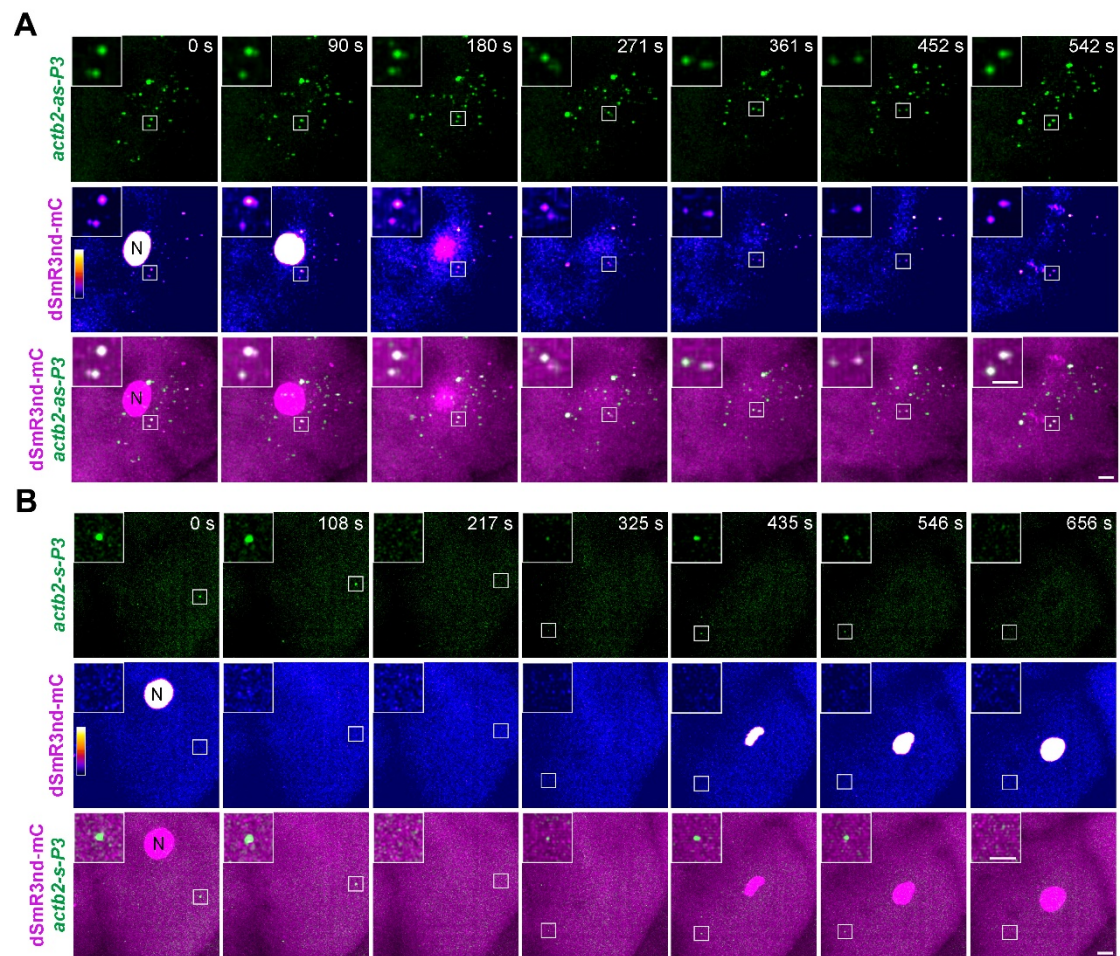

**Fig. S2. Time lapse imaging of maternal *actb2* mRNAs tracked with dSmR3nd-mCherry protein and single fluorescent probe.** One-cell stage embryos were injected with 1 ng dSmR3nd-mCherry protein as well as 300 pg fluorescein-labeled *actb2-as-P3* (A) or *actb2-s-P3* probe (B) and imaged under a confocal microscopy at the 4-cell stage. N, nucleus. Insets showed magnification of indicated areas. Note that double positive puncta were seen only in the presence of *actb2-as-P3*. Scale bars, 10  $\mu$ m (5  $\mu$ m in insets). See also Movie S1 and S2.



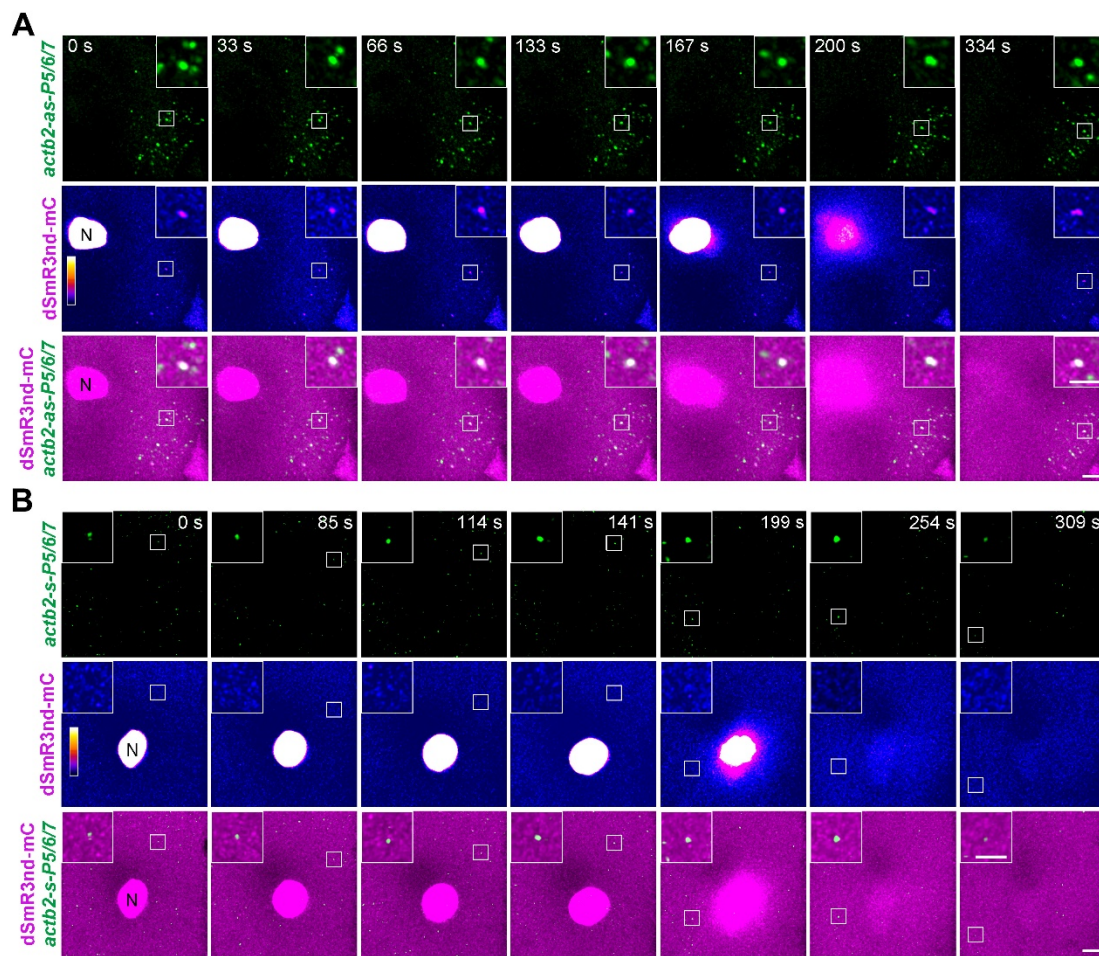

**Fig. S3. Time lapse imaging of maternal *actb2* mRNAs with dSmR3nd-mCherry protein and three short fluorescent probes.** One-cell stage embryos were injected with 1 ng dSmR3nd-mCherry protein as well as fluorescein-labeled *actb2-as-P5/6/7* (A) or (B) *actb2-s-P5/6/7* probe mix (100 pg each per embryo) and imaged under a confocal microscopy at the 4-cell stage. N, nucleus. Insets showed magnification of indicated areas. Note that double positive puncta were seen only in the presence of *actb2-as-P5/P6/P7*. Scale bars, 10  $\mu$ m (5  $\mu$ m in insets). See also Movie S3 and S4.

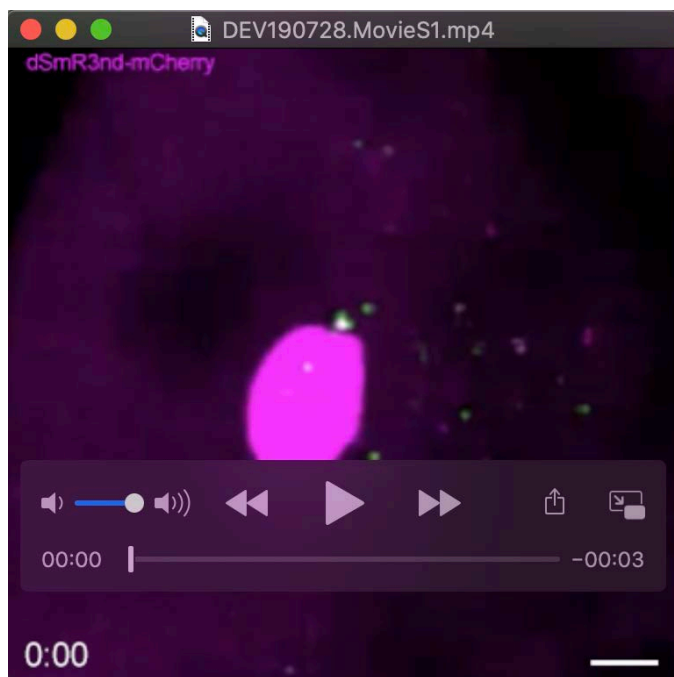

**Movie 1. Dynamics of maternal *actb2* mRNAs tracked with dSmR3nd-mCherry protein and single antisense fluorescent probe.**

One-cell stage embryos were injected with 1 ng dSmR3nd-mCherry protein and 300 pg fluorescein-labeled *actb2* antisense P3 probe and imaged at the 4-cell stage. Dual-color dSmR3nd/antisense probe puncta represented endogenous *actb2* mRNAs. The video was presented by a z-projection. Scale bar, 10  $\mu$ m.

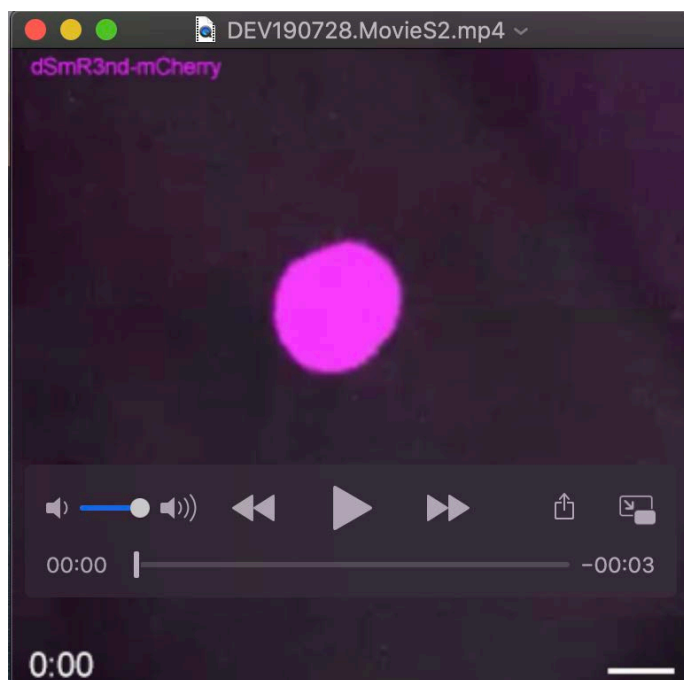

**Movie 2. Dynamics of maternal *actb2* mRNAs couldn't be tracked with dSmR3nd-mCherry protein and single sense fluorescent probe.**

One-cell stage embryos were injected with 1 ng dSmR3nd-mCherry protein and 300 pg fluorescein-labeled *actb2* sense P3 probe. Live imaging was taken at the 4-cell stage. dSmR3/sense probe puncta were hardly observed. The video was presented by a z-projection. Scale bar, 10  $\mu$ m.

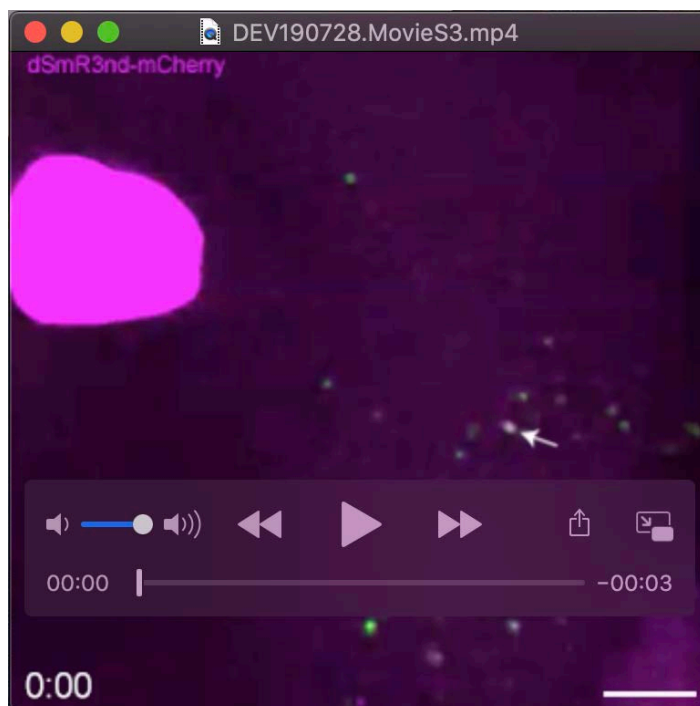

**Movie 3. Dynamics of maternal *actb2* mRNAs tracked with dSmR3nd-mCherry protein and three antisense fluorescent probes.**

One-cell stage embryos were injected with 1 ng dSmR3nd-mCherry protein and fluorescein-labeled *actb2* P5/6/7 probe mix (100 pg each per embryo) and imaged at the 4-cell stage. Dual-color dSmR3nd/antisense probes puncta represented endogenous *actb2* mRNA. The video was presented by a z-projection. Scale bar, 10  $\mu$ m.

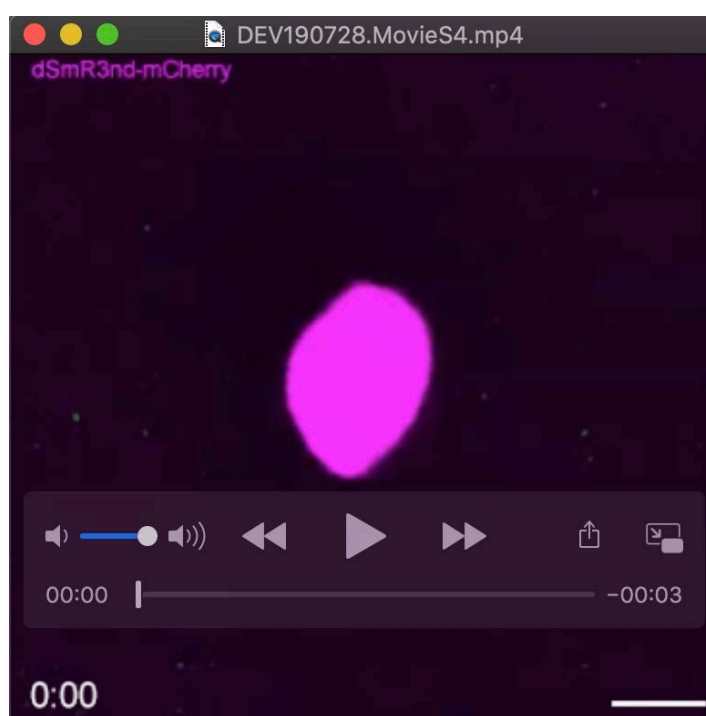

**Movie 4. Dynamics of maternal *actb2* mRNAs couldn't be tracked with dSmR3nd-mCherry protein and three sense fluorescent probes.**

One-cell stage embryos were injected with 1 ng dSmR3nd-mCherry protein and fluorescein-labeled *actb2* P5/6/7 probe mix (100 pg each per embryo) and imaged at the 4-cell stage. dSmR3/sense probe puncta are hard to be observe. The video was presented by a z-projection. Scale bar, 10  $\mu$ m.

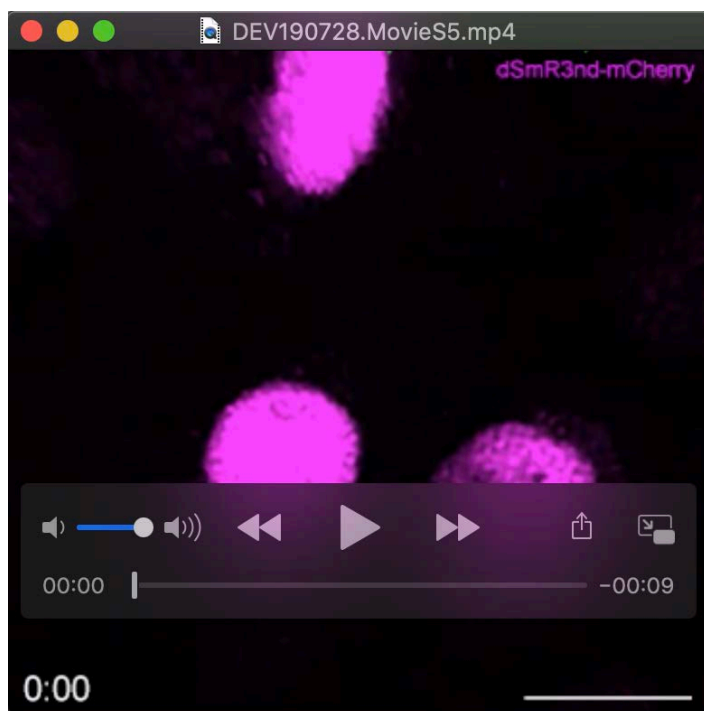

**Movie 5. Dynamics of zygotic *actb2* mRNAs tracked with dSmR3nd-mCherry protein and continuously expressed antisense probe.**

One-cell stage embryos were injected with 1 ng in vitro purified dSmR3nd-mCherry protein and 20 pg *pU6:actb2-1xP3;ef1α:GFP* plasmid DNA and imaged at the shield stage. dSmR3nd-mCherry signal could be observed to move dynamically in the cytosol, which represented *actb2* mRNA. The video was represented by a single z-plane. Scale bar, 10 μm.

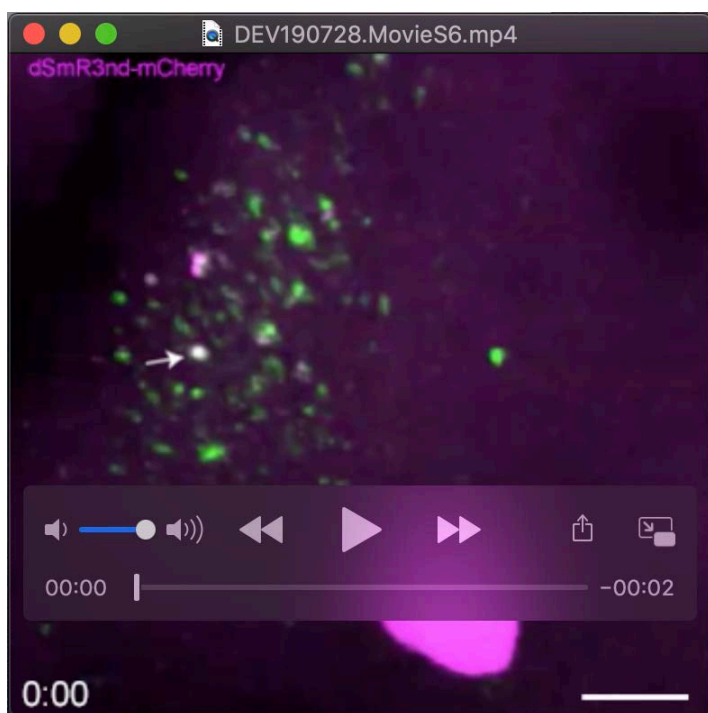

**Movie 6. Dynamics of *actb2* mRNAs simultaneously imaged with mR3/dsRNA and MCP/MS2 systems.**

One-cell stage embryos were injected with 1 ng dSmR3nd-mCherry protein, 1 ng MCP-GFP protein and 300 pg antisense *actb2* 3xP3 MS2 probe and imaged at the 4-cell stage. The video was presented by a z-projection. Scale bars, 15 μm.



**Table S1. Protein sequences of inactive mR3 originated from twelve bacterial strains**

| Species                                          | Sequence of recombinant inactive mR3 <sup>a</sup>                                                                                                                      | Deleted <sup>b</sup> |
|--------------------------------------------------|------------------------------------------------------------------------------------------------------------------------------------------------------------------------|----------------------|
| <i>Bacillus subtilis</i> (Bsu)                   | MDYKDDDDKMLEFDTIKDSKQLNGLALAYIGDAIFEVYVR<br>HHLLKQGFTKPNDLHKKSSRIVSAKSQAEIFFLQNQSFFTE<br>EEEAVLKRGRNAVQTYRYSTAFEALLGYLFLEKKEERLSQL<br>VAEAIQFGTSGRKTNESATLEHHHHHHH*    | K86-D95              |
| <i>Lactococcus lactis</i> (Lla)                  | MDYKDDDDKMOVNKQQAELLNGIALAYIGDAIYEVFVREY<br>LLDKGLTKPAMLQKNATKFVSAKAQAKIISAMDEIDFLTEC<br>ELTYFKRGRNAVVTYRISTGFEEAVVGILHLTQQKERLQEFW<br>DFCLKTIEADLVLEHHHHHHH*          | H83-D92              |
| <i>Staphylococcus aureus</i> (Sau)               | MDYKDDDDKMDNQDQDNHIKLLNPLTLAYMGDAVLDQYV<br>RTYIVLKLKSKPNKLHQMSKKYVSAKSQAQTLEYLMEQE<br>WFTDEEMDILKRGRNAVQTYRKSSAIEAVIGFLYLEKKEER<br>LEALLNEIITIVNERLEHHHHHHH*           | K85-D94              |
| <i>Staphylococcus epidermidis</i> (Sep)          | MDYKDDDDKMAKHMNVKLLNPLTLAYMGDAVLDQHVRE<br>YIVLKLQSKPHRLHQVSKSYVSAKSQAQTLEYLLDIDWFTD<br>EELSVLKRGRNAIQTYRKSSALEAVIGFLYLDHQSERLENLL<br>ETIVRIVDERLEHHHHHHH*              | K83-D92              |
| <i>Listeria innocua</i> (Lin)                    | MDYKDDDDKMAEVKDYKQLNGLALAYMGDAVYEKFFIRE<br>YLLAAGKTKPNQLHKTATKFVSAKGQAVALKAMIAEGFLT<br>DEEDRIAKRGRNAPGTYSMSTSFEAVLGYYLAGDMERLQ<br>EWMEKALEIVEKGVENNLEHHHHHHH*          | K83-D92              |
| <i>Bacillus cereus</i> (Bce)                     | MDYKDDDDKMOVDAKQLNSLALAYMGDAVYEQYIRYHLL<br>QKGTVRPNQLHRLGTSFVSAKAQAKVVYHLLTAFLTEEE<br>EAVLRRGRNAVQTYRYSTAFEALLGYHYLLNNSERLEELVY<br>KAIDVLEVKEGGTSILEHHHHHHH*           | N81-D90              |
| <i>Bacillus licheniformis</i> (Bli)              | MDYKDDDDKMOVNLETIKDAKQLNGLALAYMGDAVLEVY<br>VRHHLLKQGMTRPNDLHRQSRRYVSAKSQASMLFALEEQ<br>KFFTEEEQAVLRRGRNAVQTYRYSTAFEAVIGYLFLENRED<br>RLNELIKVALEKRDGREEVKLEHHHHHHH*      | K86-D95              |
| <i>Ruminiclostridium thermocellum</i> (Rth)      | MDYKDDDDKMOVWFFDKITGEFNYKPDEVSQLSPLVLAYI<br>GDAVYEVFIRTMLVSGGNVPVHVLHKRSIAYVKAKAQSDIV<br>HRIMPLLTEEELNIVRRGRNAITDYRYATGFESLLGFLYLKK<br>DYDRLMDILRMAVSQNLEHHHHHHH*      | K94-D103             |
| <i>Caldicellulosiruptor kristjanssonii</i> (Ckr) | MDYKDDDDKMDILKTYLKESEDRLLSPLVYAYIGDAVYEL<br>FVRNKIIAENPDLPYLYLRTTMYVKASSQAMAIIKKLYEE<br>LDEDEKRIVKRGRNALSDYKYATALEALIGYLYLANNIERL<br>NYILSQTYDIITEEYSNAKNSCQLEHHHHHHH* | K88-K97              |
| <i>Caldanaerobacter subterraneus</i> (Csb)       | MDYKDDDDKMEKDKMILVKEKGVLDLSPLVLAFIGDAVYS<br>LYVRTKIVEKGNMKLHLNEQTVKYVKASSQARSLEIRYD<br>LLTEEEKEIVRRGRNAVKEYKYATAFEALVGYLYLLERFDRL<br>YFLLSLSMEYTEELEHHHHHHH*           | K88-S97              |
| <i>Fusobacterium nucleatum</i> (Fnu)             | MDYKDDDDKMDNVDFSCKDIRDYSGLELAFGLDAIWELEIR<br>KYYLQFGYNIPTLNKYVKAKVNAKYQSLIYKKIINDLDEEF<br>KVIGKRAKNSVMEYKEATALEAIIIGAMYLLKKEEEIKKIINI                                  | N83-T92              |



|                                      |                                                                                                                                                               |         |
|--------------------------------------|---------------------------------------------------------------------------------------------------------------------------------------------------------------|---------|
|                                      | VIKGELEHHHHHH*                                                                                                                                                |         |
| <i>Thermotoga<br/>maritima (Tma)</i> | MDYKDDDDKMEKLF RF EAEPEKLPPAVLAYLGDAVLELIFR<br>SRFTGDYRMSVIHERVKEHTSKHGQAWMLENIWNLLDERE<br>QEIVKRAMNSDPTYRKSTGFEALIGYLFLKREFDRIEELLRV<br>VMDLESLRKKNP GGS AQE | K83-N90 |

a, Flag tag sequence was indicated in red characters.

b, The deleted  $\alpha 5\beta$ - $\alpha 6$  loop region that is required for ribonuclease activity.

**Table S2. Primers for cloning probes and RT-PCR analysis**

| Target/Gene                  | Forward primer (5' to 3')                                   | Reverse primer (5' to 3')                                  |
|------------------------------|-------------------------------------------------------------|------------------------------------------------------------|
| <i>actb2 P1</i>              | TCGATTCTCGAGGTCGACGGAA<br>CAGGGCCTCTGGGCA                   | GGGGCGGCCGCGGATCCGAAGAA<br>GCTGCTTCCTCCTCCTCCCT            |
| <i>actb2 P2</i>              | ATCGATTCTCGAGGTCGACCAG<br>TGTACAGGTTGGCCCC                  | GGGGCGGCCGCGGATCCGAAGAA<br>CCATTCAAGATGTAAAGGT-3'          |
| <i>actb2 P3</i>              | TCGAGGTCGACAGATCTTACAT<br>AATTACATACAATACTAC-3'             | GGGGCGGCCGCGGATCCGAAGAA<br>GTTTGTTAAATGCATTGTTC-3'         |
| <i>actb2 P4</i>              | ACATTGCCGTCACCTTCACCGT<br>TCCAGTTTTTATGATCCTGAGTC<br>AAGCGC | GCGCTTGACTCAGGATCTAAAAAC<br>TGGAACGGTGAAGGTGACGGCAAT<br>GT |
| <i>actb2 P5</i>              | GGAATGACTAAAGAAAACAAA<br>ACATGGAGTCCTCAGATGCATT<br>GTAGAAC  | GTTCTACAATGCATCTGAGGACTCC<br>ATGTTTTGTTTTCTTTAGTCATTCC     |
| <i>actb2 P6</i>              | TACATAATTTACATACAATACTA<br>CAATGTAAAGTATGCTCCCAATT<br>ACTG  | CAGTAATTGGGAGCATACTTAACAT<br>TGTAATATTGTATGTAAATTATGTA-    |
| <i>actb2 P7</i>              | GTTCCAGTTTTTATGATCCTGAG<br>TCAAGCGCCAAAAATAACAAA<br>AGCCATG | CATGGCTTTTGTTATTTTGGCGCT<br>TGACTCAGGATCTAAAACTGGAA<br>C   |
| <i>actb2 P8</i>              | TACATAATTTACATACAATACTA<br>CAATGTT                          | AACATTGTAGTATTGTATGTAAATT<br>ATGTA                         |
| <i>Ybx P1</i>                | TCGAGGTCGACAGATCTGTCGA<br>AATGCATTTTTGCAAG                  | GGGGCGGCCGCGGATCCCATCCGG<br>CCGGTTTTGTCAAG                 |
| <i>Ybx P2</i>                | TCGAGGTCGACAGATCTCCTCT<br>GTAGTAGTTCTGCCT                   | GGGGCGGCCGCGGATCCACTCACA<br>AAGAGGAGAGATG                  |
| <i>Eomesa P1</i>             | TCGAGGTCGACAGATCTCAAAT<br>CAATGGCATGCTTTTAAG                | GGGGCGGCCGCGGATCCAGTGCCA<br>AAGCTTAGCTGTG                  |
| <i>Eomesa P2</i>             | TCGAGGTCGACAGATCTGTTGT<br>GGTCGATCTTGAGCTG                  | GGGGCGGCCGCGGATCCGAAGCT<br>AAAACACAGACCT                   |
| <i>gfp</i>                   | TCGATTCTCGAGGTCGACCTTC<br>ATGTGGTCGGGGTAG                   | GGGGCGGCCGCGGATCCCATCTGC<br>ACCACCGGCAAG                   |
| <i>ybx1 ISH</i>              | CACCATACTTCGTGCGGAG                                         | CATCTGCTGTTTCCCCAAAC-3'                                    |
| <i>eomesa ISH</i>            | CCAGCAGGAGTCAGTTTG                                          | GGTCTTGGAAGAAGGGCTG                                        |
| <i>renilla luciferase RT</i> | CATGGCCTCGTGAAATCCC                                         | GAGAACTCGCTCAACGAACG                                       |
| <i>actb2 RT</i>              | ATGGATGATGAAATTGCCGCAC                                      | ACCATCACCAGAGTCCATCACG                                     |
| <i>gapdh RT</i>              | CAAGCTTACTGGTATGGCCTTC                                      | TGCTGTAACCGAACTCATTGTC                                     |
| <i>gfp RT</i>                | CTTCATGTGGTCGGGGTAGCGG<br>CTGAA                             | CATCTGCACCACCGGCAA                                         |
| <i>actb2 P3 cRT</i>          | GAGGCAAATAAGTTTCGG                                          | TATGAAGGCTGCCCAGTAA                                        |
| <i>gfp cRT</i>               | CGTAGGTCAGGGTGGTCAC                                         | GCGTGCAGTGCTTCAGCC'                                        |

The sequence in red overlapped the cloning vector pXT7 for cloning by Gibson assembly. P, antisense probes; ISH, in situ hybridization probe; RT, RT-PCR primer. cRT, primers for RT-PCR using circular RNAs.
